1 **Visual detection of binary, ternary, and quaternary protein-protein**  
2 **interactions in fission yeast by Pill co-tethering assay**

3

4 Zhong-Qiu Yu<sup>1</sup>, Xiao-Man Liu<sup>1</sup>, Dan Zhao<sup>1</sup>, Dan-Dan Xu<sup>1</sup>, Li-Lin Du<sup>1,2,\*</sup>

5

6 <sup>1</sup> *National Institute of Biological Sciences, 102206 Beijing, China.*

7 <sup>2</sup> *Tsinghua Institute of Multidisciplinary Biomedical Research, Tsinghua University, 102206*

8 *Beijing, China.*

9

10 \*Correspondence: [dulilin@nibs.ac.cn](mailto:dulilin@nibs.ac.cn)

11

12 Keywords: protein-protein interactions, Pill co-tethering assay, binary, ternary, quaternary,  
13 fission yeast.

14

15

16

17

18

19

20

21

22

23

24

25

26

27

28

29

## 30 **Abstract**

31 Protein-protein interactions are vital for executing nearly all cellular processes. To  
32 facilitate the detection of protein-protein interactions in living cells of the fission yeast  
33 *Schizosaccharomyces pombe*, here we present an efficient and convenient method termed the  
34 Pil1 co-tethering assay. In its basic form, we tether a bait protein to mCherry-tagged Pil1, which  
35 forms cortical filamentary structures, and examine whether a GFP-tagged prey protein  
36 colocalizes with the bait. We demonstrate that this assay is capable of detecting pairwise  
37 protein-protein interactions of cytosolic proteins, transmembrane proteins, and nuclear proteins.  
38 Furthermore, we show that this assay can be used for detecting not only binary protein-protein  
39 interactions, but also ternary and quaternary protein-protein interactions. Using this assay, we  
40 systematically characterized the protein-protein interactions in the Atg1 complex and in the  
41 phosphatidylinositol 3-kinase (PtdIns3K) complexes and found that Atg38 is incorporated into  
42 the PtdIns3K complex I via an Atg38-Vps34 interaction. Our data show that this assay is a  
43 useful and versatile tool and should be added to the routine toolbox of fission yeast researchers.

44

## 45 **Abbreviations**

46 Y2H: yeast two-hybrid; FRET: fluorescence resonance energy transfer; BiFC: bimolecular  
47 fluorescence complementation; AIM: Atg8-family-interacting motif; NLS: nuclear localization  
48 signal

49

## 50 **Introduction**

51 Protein-protein interactions play crucial roles in regulating and executing most cellular  
52 functions (Alberts, 1998; Gavin and Superti-Furga, 2003). The detection of whether two  
53 proteins are interacting partners can provide significant insights into understanding the cellular  
54 roles of proteins. To analyze pairwise protein-protein interactions, a variety of *in vitro* and *in*  
55 *vivo* methods have been developed. The *in vitro* methods like coimmunoprecipitation and pull-  
56 down examine the interactions outside of a living organism, thus may fail to detect protein-  
57 protein interactions that are sensitive to environments. By contrast, the *in vivo* methods allow

58 studies of protein-protein interactions in the cellular context. The most popular *in vivo* method  
59 to study protein-protein interactions is the yeast two-hybrid (Y2H) system, in which the  
60 budding yeast *Saccharomyces cerevisiae* is used as a living test tube and protein-protein  
61 interactions are detected by the activation of reporter genes through the reconstitution of a  
62 transcriptional activator in the nucleus (Fields and Song, 1989). The drawbacks of the Y2H  
63 assay include self-activation when using certain proteins as bait and false negative results for  
64 proteins unable to enter the nucleus of budding yeast and proteins only exhibit interactions in  
65 their native organisms but not in budding yeast.

66 *In vivo* methods that can be applied in the native organisms include fluorescence-based  
67 methods such as fluorescence resonance energy transfer (FRET) (Truong and Ikura, 2001) and  
68 bimolecular fluorescence complementation (BiFC) (Kerppola, 2006). These methods enable  
69 direct visualization of protein-protein interactions in living cells of the native organisms.  
70 However, both FRET and BiFC have their own drawbacks, with the former requiring  
71 specialized equipment and yielding a low signal output, and the latter suffering from the  
72 irreversibility of the binding of the split fluorescent protein fragments and the tendency of the  
73 split fluorescent protein fragments to fold together spontaneously.

74 In addition to binary protein-protein interactions, proteins also engage in ternary,  
75 quaternary, and even higher order interactions (Alberts, 1998). To detect and characterize  
76 ternary protein-protein interactions in living cells, yeast three-hybrid (Y3H) system (Zhang and  
77 Lautar, 1996), three-chromophore FRET (3-FRET) (Galperin et al., 2004), multicolor BiFC  
78 (Hu and Kerppola, 2003), and BiFC-based FRET (Shyu et al., 2008) have been developed  
79 based on the Y2H, FRET, and BiFC methods. However, they suffer similar limitations as the  
80 corresponding original methods.

81 The fission yeast *Schizosaccharomyces pombe* is a widely-used and powerful model  
82 organism for dissecting the mechanisms of a diverse range of cellular processes (Hoffman et  
83 al., 2015). For example, in recent years, we and others have used *S. pombe* to study  
84 autophagy (Fukuda et al., 2020; Liu et al., 2018; Matsuhara and Yamamoto, 2016;  
85 Mukaiyama et al., 2009; Nanji et al., 2017; Pan et al., 2020; Sun et al., 2013; Suzuki et al.,

86 2015; Yu et al., 2020; Zhao et al., 2016, 2020). To facilitate the detection of *in vivo* protein-  
87 protein interactions in fission yeast, we have developed an imaging-based assay termed the  
88 Pil1 co-tethering assay. By fusing bait proteins to mCherry-tagged Pil1, which localizes to  
89 distinctive filamentary structures (Kabeche et al., 2011), and fusing prey proteins to a GFP,  
90 YFP, or CFP tag, protein-protein interactions can be visually detected as the colocalization of  
91 fluorescence signals in living fission yeast cells. We found that this assay is widely applicable  
92 in detecting pairwise protein-protein interactions of cytosolic proteins, transmembrane  
93 proteins, and nuclear proteins. Moreover, with this assay, we systematically examined the  
94 binary interactions among subunits of the Atg1 complex and the binary, ternary, and  
95 quaternary interactions among subunits of two PtdIns3K complexes. These application cases  
96 demonstrate the usefulness of this assay.

97

## 98 **Results**

### 99 **Basic design of the Pil1 co-tethering assay**

100 Pil1 forms cortical filaments in fission yeast cells (Kabeche et al., 2011) (Fig. 1A). The  
101 distinctive localization pattern of Pil1 makes it an ideal anchor for imaging-based detection of  
102 protein-protein interactions. In our basic design of the Pil1 co-tethering assay, two plasmids  
103 are constructed and introduced into fission yeast cells. One plasmid ectopically expresses from  
104 a medium-strength promoter (the *4Inmt1* promoter) a fusion between Pil1, the red fluorescent  
105 protein mCherry, and a bait protein. The other plasmid ectopically expresses from the *4Inmt1*  
106 promoter a fusion between the green fluorescent protein GFP and a prey protein. If the prey  
107 protein interacts with the bait protein, the GFP signal colocalizes with the mCherry signal on  
108 filamentary structures (Fig. 1B).

109

### 110 **Detecting the interactions between Atg8 and Atg8-interacting proteins using the Pil1 co-** 111 **tethering assay**

112 We first tested whether the Pil1 co-tethering assay can detect a previously reported  
113 interaction between two autophagy proteins, Atg8 and Atg38 (Yu et al., 2020). The ubiquitin-



114 like protein Atg8 interacts with selective autophagy receptors and core autophagy-related (Atg)  
115 proteins via their Atg8-family-interacting motifs (AIMs) (Noda et al., 2010). Atg38 is a subunit  
116 of the PtdIns3K complex I (Araki et al., 2013; Yu et al., 2020). Fission yeast Atg38 contains an  
117 AIM (Yu et al., 2020) (Fig. 2A). We constructed a plasmid expressing a bait fusion protein  
118 consisting of Pil1 followed by mCherry and a 30-amino-acid Atg38 fragment, Atg38(161-190),  
119 which encompasses the AIM. This fusion protein localized to filament-like structures, in a  
120 manner similar to the distribution of Pil1-mCherry (Fig. 2B), suggesting that this fusion protein  
121 localizes to the Pil1 filaments. In cells expressing both Pil1-mCherry-Atg38(161-190) and  
122 GFP-tagged Atg8, the fluorescence signals of mCherry and GFP colocalized on the filamentary  
123 structures. As a negative control, in cells co-expressing Pil1-mCherry and GFP-Atg8, GFP-  
124 Atg8 showed a diffuse distribution in the cytosol and nucleus. Furthermore, mutating one or  
125 both of the two key residues in the AIM of Atg38, Phe178 and Val181, to alanine(s) totally  
126 abolished the colocalization on the filamentary structures. Mutating Pro52 and Arg67 in the  
127 AIM-binding region of Atg8 to alanines diminished the colocalization (Fig. 2B). These results  
128 are consistent with published results obtained using Y2H, coimmunoprecipitation, and pull-  
129 down assays (Yu et al., 2020).

130 To quantitate the degree of colocalization between mCherry and GFP signals, we  
131 computed a Pearson correlation coefficient (PCC), whose values range from -1 to 1. Strong  
132 colocalization corresponds to a PCC value close to 1, whereas lack of colocalization  
133 corresponds to a PCC value close to 0 (Adler and Parmryd, 2010; Dunn et al., 2011). Consistent  
134 with the visual impression, the PCC values for the pairs of free Pil1 and Atg8 (negative control),  
135 Atg38(161-190) and Atg8, Atg38(161-190)<sup>F178A</sup> and Atg8, Atg38(161-190)<sup>V181A</sup> and Atg8,  
136 Atg38(161-190)<sup>F178A V181A</sup> and Atg8, and Atg38(161-190) and Atg8<sup>P52A R67A</sup> were 0.14, 0.76,  
137 0.17, 0.19, 0.16, and 0.42, respectively (Fig. 2C). Thus, PCC values are useful quantitative  
138 measures of the pairwise interactions detected by the Pil1 co-tethering assay.

139 Next, we used the Pil1 co-tethering assay to examine a previously reported interaction  
140 between Atg8 and Hfl1 (Liu et al., 2018). Hfl1 is a vacuole membrane-localized protein  
141 containing seven transmembrane helices in its N-terminus and a noncanonical helical AIM in

142 its C-terminal cytosolic tail (Fig. 2D). We used Atg8(1-115), which lacks the last six residues  
143 of Atg8, as bait, and a soluble fragment of Hfl1, Hfl1(386-409), which was previously shown  
144 to be sufficient for binding Atg8 (Liu et al., 2018), as prey. Hfl1(386-409)-GFP colocalized  
145 with Pil1-mCherry-Atg8(1-115) and this colocalization was abolished when the key residue in  
146 the helical AIM of Hfl1, Tyr398, was mutated to alanine (Fig. 2E,F). Together, these results  
147 obtained using Atg8 and its two binding proteins demonstrate that the Pil1 co-tethering assay  
148 is suitable to study interactions between cytosolic proteins in fission yeast.

149

### 150 **Detecting the interactions between transmembrane proteins using the Pil1 co-tethering** 151 **assay**

152 Interactions between transmembrane proteins are in general more difficult to detect  
153 than interactions between soluble proteins. Atg9 and Ctl1 are two multi-transmembrane  
154 proteins involved in autophagy and are known to interact with each other (Sun et al., 2013).  
155 Atg9 possesses four transmembrane helices and two reentrant membrane helices (Guardia et  
156 al., 2020; K et al., 2020; Maeda et al., 2020), and Ctl1 contains ten predicted transmembrane  
157 helices (Fig. 3A). We tested whether the Pil1 co-tethering assay can detect the interaction  
158 between Ctl1 and Atg9. Pil1-mCherry-Ctl1 showed a localization typical of the Pil1 filaments  
159 and the co-expressed Atg9-YFP localized to these filamentary structures (Fig. 3B,C). Thus, the  
160 Pil1 co-tethering assay can be used to study the interactions between transmembrane proteins.

161

### 162 **Detecting the interactions between nuclear proteins using the Pil1 co-tethering assay**

163 Pil1 filaments are cytoplasmic structures located outside of the nucleus. Therefore, we  
164 anticipated that the Pil1 co-tethering assay may encounter difficulty detecting interactions  
165 between nuclear-localized proteins. Nevertheless, we tested the Pil1 co-tethering assay using  
166 two nuclear-localized proteins Xrc4 and Lig4, which interact with each other and participate  
167 in the nonhomologous end joining (NHEJ) pathway of DNA double-strand break repair (Li et  
168 al., 2014). We chose Xrc4, which lacks a nuclear localization signal (NLS) and relies on Lig4  
169 for its nuclear localization (Li et al., 2014) (Fig. 3D), as bait. As negative control, in cells

170 expressing Pil1-mCherry, Lig4-GFP predominantly localized inside the nucleus (Fig. 3E). In  
171 contrast, in cells expressing Pil1-mCherry-Xrc4, a notable portion of Lig4-GFP colocalized  
172 with Pil1-mCherry-Xrc4 on cytoplasmic filamentary structures (Fig. 3E,F). Interestingly, when  
173 co-expressed with Lig4-GFP, a fraction of Pil1-mCherry-Xrc4 localized to the nucleus (Fig.  
174 3E), presumably due to the interaction with the fraction of Lig4-GFP localized in the nucleus,  
175 because when co-expressed with a truncated Lig4 fragment that lacks the NLS but is still  
176 capable of binding Xrc4 (Li et al., 2014) (Fig. 3G,H), Pil1-mCherry-Xrc4 no longer exhibited  
177 the nucleus-localized signals (Fig. 3G). These results indicate that it is feasible to use the Pil1  
178 co-tethering assay to study interactions between nuclear proteins, as NLS-mediated nuclear  
179 targeting does not completely prevent Pil1-fused bait and its binding partner from localizing to  
180 cytoplasmic filaments.

181

## 182 **Systematically probing the interactions among subunits of the Atg1 complex using the** 183 **Pil1 co-tethering assay**

184 The fission yeast Atg1 complex plays important roles in the initiation of starvation-  
185 induced autophagy and includes five components, namely, Atg1, Atg11, Atg13, Atg17, and  
186 Atg101 (Nanji et al., 2017; Pan et al., 2020; Sun et al., 2013; Suzuki et al., 2015) (Fig. 4A). We  
187 applied the Pil1 co-tethering assay to exhaustively examined the pairwise interactions among  
188 the five subunits, including self-interactions. To present the results in a concise manner, we  
189 used the PCC values to classify the results into three categories: strong colocalization, weak  
190 colocalization, and no obvious colocalization. Strong colocalization corresponds to PCC values  
191 greater than 0.7. Weak colocalization corresponds to PCC values less than 0.7 but greater than  
192 a threshold value. No obvious colocalization corresponds to PCC values less than the threshold  
193 value. The threshold value is either 0.3 or the PCC value obtained using free GFP as prey plus  
194 0.05, whichever number is greater. In most cases, this threshold value is 0.3 (Fig. 4C). The only  
195 instance that this threshold value is greater than 0.3 is when using Pil1-mCherry-Atg1 as bait.  
196 In that instance, the control using the free GFP prey yielded a PCC value of 0.37 and thus the  
197 threshold was set at 0.42 (Fig. S1C,D).

198 We found bidirectional strong colocalizations (PCC > 0.7) between Atg1 and Atg11,  
199 between Atg13 and Atg17, and between Atg13 and Atg101 (Fig. S1, S2A,B,C,D, 4B,C,D,E),  
200 indicating that Atg1 tightly interacts with Atg11 and that Atg13 tightly interacts with Atg17  
201 and Atg101. The Atg1-Atg13 pair exhibited strong colocalization in one direction and weak  
202 interaction in another direction (Fig. S1C,D, S2A,B, 4D,E). These four pairs of interactions are  
203 consistent with previously published results obtained using in-vitro pull-down of recombinant  
204 proteins (Nanji et al., 2017; Pan et al., 2020), indicating that these pairs of relatively strong  
205 interactions identified by the Pill co-tethering assay are direct physical interactions.

206 In addition to these relatively strong colocalizations, we detected weak colocalizations  
207 between Atg1 and Atg17 and between Atg11 and Atg13 (Fig. S1, S2A,B, 4B,C,D,E). The  
208 colocalization between Atg11 and Atg13 is independent of endogenous Atg1 (Fig. S2E,F,G,H),  
209 excluding the possibility that this colocalization is bridged by endogenous Atg1 through the  
210 Atg1-Atg11 interaction and the Atg1-Atg13 interaction. Thus, the interaction between Atg11  
211 and Atg13 may be direct, despite being relatively weak in the Pill co-tethering assay.

212 Atg11 and Atg17 were also observed to self-interact in the Pill co-tethering assay (Fig.  
213 S1E,F, 4B,C,D,E), consistent with previously published results showing that both Atg11 and  
214 Atg17 can homodimerize (Nanji et al., 2017; Pan et al., 2020). Together, within the fission  
215 yeast Atg1 complex, the Pill co-tethering assay recapitulated six previously known binary  
216 interactions (Atg1-Atg11, Atg13-Atg17, Atg13-Atg101, Atg1-Atg13, Atg11-Atg11, and  
217 Atg17-Atg17), and identified two previously unknown binary interactions (Atg1-Atg17 and  
218 Atg11-Atg13). These results demonstrate the usefulness of the Pill co-tethering assay in  
219 detecting protein-protein interactions within a multiprotein complex.

220

## 221 **Characterizing the binary interactions among subunits of PtdIns3K complexes using the** 222 **Pill co-tethering assay**

223 In fission yeast, there are two PtdIns3K complexes: the PtdIns3K complex I, which  
224 functions in autophagy, and the PtdIns3K complex II, which participates in vacuolar protein  
225 sorting. These two complexes share three common subunits: Vps15, Vps34, and Atg6; complex

226 I possesses two specific subunits: Atg14 and Atg38; complex II possesses one specific subunit:  
227 Vps38 (Yu et al., 2020) (Figure 5A). It remains incompletely understood how these two  
228 complexes are organized, and in particular, how Atg38 is integrated into the PtdIns3K complex  
229 I. To further our understanding of these two complexes, we applied the Pil1 co-tethering assay  
230 to systematically examine all pairwise combinations of the six proteins. We observed four pairs  
231 of bidirectional strong colocalizations ( $PCC > 0.7$ ): Vps15 and Vps34, Vps34 and Atg38, Atg6  
232 and Atg14, and Atg6 and Vps38 (Fig. S3, S4, S5, 5B,C). Additionally, weak colocalizations  
233 ( $0.3 < PCC < 0.7$ ) were observed between Vps15 and Atg6, between Vps15 and Atg14,  
234 between Vps15 and Vps38, between Vps34 and Atg6, and between Atg6 bait and Atg6 prey  
235 (Fig. S4, S5, 5B,C). Thus, we obtained a protein-protein interaction map of the PtdIns3K  
236 complexes (Figure 5C). Among these interactions, only the interaction between Atg6 and  
237 Vps38 and the Atg6 self-interaction were detected in a proteome-wide Y2H analysis (Vo et al.,  
238 2016), suggesting that the Pil1 co-tethering assay has high sensitivity in detecting binary  
239 interactions within multiprotein complexes.

240 To ascertain whether the four pairs of strong colocalizations detected by the Pil1 co-  
241 tethering assay reflect direct interactions or indirect interactions bridged by other subunits of  
242 the complexes, we performed the Pil1 co-tethering assay in cells lacking subunits other than  
243 those used as bait and prey. For the Vps15-Vps34 pair, we deleted the four genes encoding the  
244 other subunits of the two PtdIns3K complexes and found that in the absence of Atg6, Atg14,  
245 Atg38, and Vps38, the interaction between Vps15 and Vps34 remained unchanged (Fig.  
246 S6A,B,C,D). Similarly, we found that the interaction between Vps34 and Atg38 is independent  
247 of all the other subunits of the PI3K complex I, Vps15, Atg6, and Atg14 (Fig. S6E,F,G,H), the  
248 interaction between Atg6 and Atg14 is independent of all the other subunits of the PI3K  
249 complex I, Vps15, Vps34, and Atg38 (Fig. S6I,J,K,L), and the interaction between Atg6 and  
250 Vps38 is independent of all the other subunits of the PI3K complex II, Vps15 and Vps34 (Fig.  
251 S6M,N,O,P). These results suggest that the four pairs of strong protein-protein interactions are  
252 not mediated by any other subunits of the corresponding complex(es) and are probably direct  
253 interactions.

254 A 4.4 Å resolution crystal structure of the budding yeast PtdIns3K complex II has been  
255 reported (Rostislavleva et al., 2015). In that structure, the buried surface areas between Vps15  
256 and Vps34, between Atg6 and Vps38, between Vps15 and Atg6, between Vps15 and Vps38,  
257 between Vps34 and Atg6, and between Vps34 and Vps38 are 3528 Å<sup>2</sup>, 2496 Å<sup>2</sup>, 921 Å<sup>2</sup>, 1702  
258 Å<sup>2</sup>, 92 Å<sup>2</sup>, and 24 Å<sup>2</sup>, respectively. Given that binding affinity directly correlates with the  
259 amount of buried surface areas (Chen et al., 2013), the interactions between Vps15 and Vps34  
260 and between Atg6 and Vps38 are likely stronger than the other pairs of interactions within the  
261 PtdIns3K complex II, consistent with our observations in the Pil1 co-tethering assay that Vps15  
262 strongly colocalized with Vps34, and Atg6 strongly colocalized with Vps38. Because the low  
263 resolution electron microscopy structures of the PtdIns3K complex I showed that it adopts an  
264 overall structure similar in shape to that of the PtdIns3K complex II (Baskaran et al., 2014; Ma  
265 et al., 2017; Young et al., 2019), and the complex I-specific subunit Atg14 is known to bind to  
266 Atg6 in a manner similar to the complex II-specific subunit Vps38 (Itakura et al., 2008), it is  
267 likely that there is also a large buried surface area between Atg6 and Atg14 in the PtdIns3K  
268 complex I, consistent with the strong colocalization between Atg6 and Atg14 in the Pil1 co-  
269 tethering assay. The structural relationship between Atg38 and other subunits of PtdIns3K  
270 complex I has not been clearly resolved, but the published structural studies on budding yeast  
271 Atg38 and the human homolog of Atg38 (called NRBF2) do not support any extensive contact  
272 between Atg38/NRBF2 and Vps34 (Ohashi et al., 2016; Young et al., 2016, 2019). Thus, the  
273 four pairs of strong colocalizations we observed using the Pil1 co-tethering assay include three  
274 pairs (Vps15-Vps34, Atg6-Vps14, and Atg6-Vps38) that are consistent with previous  
275 structural knowledge and one pair (Vps34-Atg38) that is unexpected from previous structural  
276 knowledge obtained using budding yeast and human proteins, suggesting that the structural  
277 organization of the PtdIns3K complex I in fission yeast may be different from that in budding  
278 yeast and humans.

279

## 280 **The Vps34-Atg38 interaction is important for autophagy**

281 In a sequence alignment of Atg38 proteins from four fission yeast species belonging to

282 the *Schizosaccharomyces* genus, we noticed that, between the MIT domain and the AIM, there  
283 exists a conserved stretch of 10 amino acids located between residues 152 and 161 of *S. pombe*  
284 Atg38 (Fig. 5D). We wondered whether this region is required for the interaction between  
285 Vps34 and Atg38. Using the Pil1 co-tethering assay, we found that, either deleting residues  
286 153-160, which are predicted to adopt a  $\beta$  strand conformation, or mutating Phe157 to alanine  
287 largely blocked the Vps34-Atg38 interaction (Fig. 5E,F). To further investigate whether this  
288 interaction is important for autophagy, we used the Pho8 $\Delta$ 60 assay, in which Pho8 $\Delta$ 60 is  
289 transported into the vacuole in an autophagy-dependent manner and activated by vacuolar  
290 proteases (Noda and Klionsky, 2008; Yu et al., 2020), to analyze the effect of the Atg38-F157A  
291 mutation on autophagy. This mutation diminished the starvation-induced increase of Pho8 $\Delta$ 60  
292 activity, and fusing Vps34 to the F157A-mutated Atg38 rescued this impairment (Fig. 5G),  
293 indicating that the Vps34-Atg38 interaction is important for autophagy.

294

### 295 **Detecting the ternary Vps15-Vps34-Atg38 interaction using the Pil1 co-tethering assay**

296 Because Vps34 tightly interacts with Vps15 and Atg38 and both binary interactions are  
297 independent of the other subunits of PtdIns3K complexes, we hypothesized that Vps34 may  
298 bridge the association between Vps15 and Atg38 in the assembly of the PtdIns3K complex I.  
299 To test this idea, we introduced into the Pil1 co-tethering assay system a third plasmid  
300 ectopically expressing from the *4Inmt1* promoter a cyan fluorescent protein (CFP)-tagged prey  
301 protein so that ternary protein-protein interactions can be detected. When CFP-tagged Vps34  
302 was co-expressed, GFP-Atg38 strongly colocalized with Pil1-mCherry-Vps15 on filamentary  
303 structures, whereas no colocalization was observed without the ectopic expression of Vps34  
304 (Fig. 6A,B). Similarly, ectopic expression of CFP-Vps34 also led to the colocalization between  
305 GFP-Vps15 and Pil1-mCherry-Atg38 (Fig. 6C,D). These results support the idea that Vps34  
306 can bridge the interaction between Vps15 and Atg38. Thus, the Pil1 co-tethering assay can be  
307 used to detect ternary interactions.

308 Truncation analysis of Vps34 showed that residues 1-250 of Vps34 containing a C2  
309 domain mediate its interaction with Vps15 (Fig. 6E,F), whereas residues 251-801 of Vps34



310 including a helical domain and a lipid kinase domain are responsible for binding Atg38 (Fig.  
311 6G,H). Thus, Vps34 bridges the Vps15-Atg38 interaction by simultaneously binding both  
312 Vps15 and Atg38 through different regions.

313 We also examined whether ectopic expression of Vps34 promotes the interactions  
314 between Vps15 and the other three subunits of the two PtdIns3K complexes, Atg6, Atg14, and  
315 Vps38, which did not exhibit strong interactions with Vps34 in the binary Pil1 co-tethering  
316 assay. Unsurprisingly, none of them showed a stronger colocalization with Pil1-mCherry-  
317 Vps15 upon the ectopic expression of Vps34 (Fig. S7).

318

### 319 **Detecting the ternary interactions formed between Vps15 and either the Atg6-Atg14** 320 **subcomplex or the Atg6-Vps38 subcomplex**

321 In the budding yeast *Saccharomyces cerevisiae*, Atg6 and Atg14 form a subcomplex in  
322 the PtdIns3K complex I and Atg6 and Vps38 form a subcomplex in the PtdIns3K complex II  
323 (Araki et al., 2013; Rostislavleva et al., 2015). Similarly, we observed using the Pil1 co-  
324 tethering assay that, in fission yeast, strong pairwise interactions exist between Atg6 and Atg14  
325 and between Atg6 and Vps38 (Fig. S4, S5, 5B,C). However, none of these three proteins  
326 exhibited strong interactions with other subunits of the two PtdIns3K complexes (Fig. S3, S4,  
327 S5, 5B,C). We hypothesized that they may only strongly engage other subunits after forming  
328 the Atg6-Atg14 subcomplex or the Atg6-Vps38 subcomplex. To test this idea, we used the Pil1  
329 co-tethering assay to examine whether ternary interactions exist between the Atg6-Atg14  
330 subcomplex and the other subunits of the PtdIns3K complex I, and between the Atg6-Vps38  
331 subcomplex and the other subunits of the PtdIns3K complex II.

332 In contrast to the observations that Vps15 showed no colocalization with Atg14 and  
333 Vps38 when using Atg14 and Vps38 individually as bait in the Pil1 co-tethering assay, upon  
334 ectopically expressing CFP-tagged Atg6, GFP-tagged Vps15 strongly colocalized with Pil1-  
335 mCherry-Atg14 as well as with Pil1-mCherry-Vps38 (Fig. 7A,B,C,D). Endogenous Vps34 is  
336 not required for these ternary interactions (Fig. 7A,B,C,D). When using Atg6 as bait, the  
337 ectopic expression of Atg14 or Vps38 notably enhanced the colocalization between Atg6 and



338 Vps15 (Fig. 7E,F). These results suggest that the Atg6-Atg14 subcomplex and the Atg6-Vps38  
339 subcomplex bind Vps15 more strongly than Atg6, Atg14, and Vps38 individually. Ectopic  
340 expression of Atg6 had no effect on the colocalizations between Atg14 and Vps34, between  
341 Vps38 and Vps34, and between Atg14 and Atg38 (Fig. S8). Taken together, these results  
342 suggest that the Atg6-Atg14 subcomplex and the Atg6-Vps38 subcomplex are respectively  
343 incorporated into the PtdIns3K complex I and the PtdIns3K complex II through engaging  
344 Vps15.

345

### 346 **Detecting the quaternary interactions formed among Vps34, Vps15, and either the Atg6-** 347 **Atg14 subcomplex or the Atg6-Vps38 subcomplex**

348 Given that Vps34 strongly interacted with Vps15 and Vps15 strongly interacted with the  
349 Atg6-Atg14 subcomplex and the Atg6-Vps38 subcomplex, we hypothesized that Vps15 may  
350 bridge the association between Vps34 and these two subcomplexes. To test this, in the ternary  
351 Pill co-tethering assay systems using Pill-mCherry-fused Vps34 as bait and CFP-tagged Atg6  
352 and GFP-tagged Atg14 or Vps38 as preys, we ectopically expressed Vps15 by introducing a  
353 fourth plasmid expressing from the *41nmt1* promoter 13Myc-tagged Vps15. Without the  
354 ectopic expression of Vps15, no or little colocalizations were observed between preys and Pill-  
355 mCherry-Vps34 (Fig. 8A,B,C,D). In contrast, when Vps15 was ectopically expressed, the  
356 preys obviously colocalized with Pill-mCherry-Vps34 (Fig. 8A,B,C,D). Thus, using the Pill  
357 co-tethering assay we detected the quaternary Vps34-Vps15-Atg6-Atg14 interaction and the  
358 quaternary Vps34-Vps15-Atg6-Vps38 interaction.

359 Collectively, the binary, ternary, and quaternary interactions obtained using the Pill co-  
360 tethering assay revealed the organization of the two PtdIns3K complexes in fission yeast: in  
361 the PtdIns3K complex I, Vps15 bridges the association between the Atg6-Atg14 subcomplex  
362 and Vps34, which is the subunit linking Atg38 to the rest of the complex; in the PtdIns3K  
363 complex II, Vps15 bridges the association between the Atg6-Vps38 subcomplex and Vps34  
364 (Fig. 8E).

365

## 366 Discussion

367 Here we report a new method, which we termed the Pil1 co-tethering assay, to visually  
368 detect protein-protein interactions in fission yeast. In this method, the colocalization of GFP-,  
369 YFP-, or CFP-tagged prey protein(s) with a Pil1-mCherry-fused bait protein on visually  
370 distinctive cytoplasmic filaments indicates bait and prey proteins can interact with each other.  
371 The successful applications of this method to cytosolic proteins Atg8 and Atg8-interacting  
372 proteins, transmembrane proteins Atg9 and Ctl1, nuclear proteins Xrc4 and Lig4, components  
373 of the Atg1 complex, and components of the two PtdIns3K complexes demonstrate that the  
374 Pil1 co-tethering assay is an effective tool that can be broadly used to detect protein-protein  
375 interactions. In other organisms, imaging-based colocalization assays similar in principle but  
376 different in design have been used for the detection of binary protein-protein interactions  
377 (Blanchard et al., 2006; Gallego et al., 2013; Hecce et al., 2013; Lv et al., 2017; Miller et al.,  
378 2007; Yurlova et al., 2014; Zolghadr et al., 2008). In this study, we expanded the applications  
379 of this class of assays to the detection of ternary and quaternary protein-protein interactions.

380 Using the Pil1 co-tethering assay, we detected two modes of ternary protein-protein  
381 interactions within the two PtdIns3K complexes. In the first mode, one protein bridges the  
382 interaction of two others, as exemplified by the ternary Vps15-Vps34-Atg38 interaction (Fig.  
383 6A,B,C,D). In the second mode, a complex formed by two proteins, but not each protein  
384 individually, strongly interacts with the third protein, as in the scenarios of the Atg14-Atg6-  
385 Vps15 interaction and the Vps38-Atg6-Vps15 interaction (Fig. 7).

386 According to structural studies using proteins from budding yeast and humans, the two  
387 PtdIns3K complexes adopt a V-shaped architecture, in which Vps15 organizes these two  
388 complexes by bridging Vps34 and the Atg6-Atg14 subcomplex or the Atg6-Vps38 subcomplex  
389 (Baskaran et al., 2014; Ma et al., 2017; Rostislavleva et al., 2015). Our results of the binary,  
390 ternary, and quaternary interactions of Vps15, Vps34, Atg6, Atg14, and Vps38 (Fig. 5, 7, 8, S3,  
391 S4, S5, S6, S7, S8) support that the fission yeast PtdIns3K complexes share a similar overall  
392 structure with their counterparts in budding yeast and mammals. However, how the fifth  
393 subunit of the PtdIns3K complex I, Atg38 (NRBF2 in mammals), is incorporated into this

394 complex seems vary among different species. Budding yeast Atg38 was initially reported to  
395 interact with Atg14 and Vps34 and thereby links the Vps15-Vps34 subcomplex and the Atg6-  
396 Atg14 subcomplex (Araki et al., 2013), but a later study failed to find evidence supporting the  
397 Atg38-Vps34 interaction (Ohashi et al., 2016). Mammalian NRBF2 was shown to interact with  
398 ATG14 and BECN1/Beclin 1 (homolog of yeasts Atg6) but not Vps34 (Young et al., 2016,  
399 2019). Differing from the situations in budding yeast and mammals, we found that fission yeast  
400 Atg38 is incorporated into the PtdIns3K complex I by binding to the 251-801 region of Vps34  
401 consisting of a helical domain and a lipid kinase domain (Fig. 6).

402 The newly established Pil1 co-tethering assay in fission yeast has the following  
403 advantages: (1) Compared to in vitro methods, this assay does not need to isolate proteins from  
404 their native cellular environments, thus can better preserve protein-protein interactions; (2)  
405 Compared to the popular Y2H assay, this assay does not need a reporter gene, thus avoiding  
406 false positives or false negatives associated with the use of reporter genes; (3) This assay does  
407 not require specialized equipment or technical expertise: fluorescent proteins-fused bait and  
408 prey proteins can be visualized using a regular fluorescent microscope and the interaction is  
409 reported by their colocalization on the Pil1 filaments in living cells, an easy and straightforward  
410 readout; (4) The introduction of PCC to evaluate the degree of colocalization between bait and  
411 prey proteins allows the strengths of the interactions to be measured in a quantitative manner;  
412 (5) This assay is useful for detecting and characterizing not only binary interactions, but also  
413 ternary and quaternary interactions.

414 On the other hand, like other protein-protein interaction assays, the Pil1 co-tethering  
415 assay has limitations. First, proteins that interact with Pil1 cannot be used in this assay. Such  
416 proteins should be rare and the use of the free Pil1 control should be able to identify such  
417 situations. Second, protein fusion may interfere with the interactions. For instance, we noticed  
418 that the colocalization between Atg1 and Atg13 was strong when Atg1 was N-terminally  
419 tagged with Pil1-mCherry and used as bait, but was weak when Atg1 was C-terminally tagged  
420 with GFP and used as prey (Fig. S1C,D, S2A,B, 4D,E). Considering that in *S. cerevisiae* Atg1  
421 binds Atg13 via its two tandem MIT domains located at the most C-terminus of Atg1 (Fujioka

422 et al., 2014), it is possible that GFP fused at the C-terminus of Atg1 may partially hinder the  
423 interaction between Atg1 and Atg13. In our current design of the Pill co-tethering assay, bait  
424 proteins are always N-terminally tagged and prey proteins can be either N-terminally or C-  
425 terminally tagged. Thus, proteins that may be sensitive to tagging at the N-terminus should be  
426 C-terminally tagged and used as preys. Third, this assay cannot distinguish whether a protein-  
427 protein interaction is direct or bridged by other proteins. Genetically deleting genes encoding  
428 proteins that may bridge the interaction, such as other subunits in the same complex, can help  
429 address this question. Last, although we have demonstrated that this assay is applicable to  
430 transmembrane proteins and nuclear proteins, it remains possible that certain proteins with  
431 specific subcellular localizations may be unsuitable for this assay.

432 In summary, we established a convenient and effective method, the Pill co-tethering  
433 assay, to allow visual detection of binary, ternary, and quaternary protein-protein interactions  
434 in living *S. pombe* cells. For its simplicity and reliability, this method can be used as a routine  
435 assay to examine whether two proteins interact, characterize protein-protein interactions in  
436 multiprotein complexes, and map interaction regions. It can also be employed to investigate  
437 how genetic and environmental changes affect protein-protein interactions. It has the potential  
438 to be applied in a large-scale manner if combined with a high-throughput imaging instrument.  
439 Even though the Pill co-tethering assay is particularly suitable for investigating fission yeast  
440 proteins in their native cellular context, it can also be used as a heterologous assay system for  
441 studying proteins from other organisms.

442

## 443 **Materials and methods**

### 444 **Fission yeast strains and plasmids**

445 Fission yeast strains used in this study are listed in Table S1, and plasmids used in this study  
446 are listed in Table S2. Genetic methods for strain construction and composition of media are as  
447 described previously (Forsburg and Rhind, 2006). Deletion strains used in this study were  
448 constructed by standard PCR-based gene targeting (Bähler et al., 1998). Plasmids expressing  
449 Pill-mCherry-fused bait proteins or GFP-fused prey proteins under the control of the *4lnmt1*

450 (medium-strength *nmt1* promoter) promoter were constructed using modified pDUAL vectors  
451 (Matsuyama et al., 2004) (PMID: 24806815). The resulting pDUAL-based plasmids were  
452 linearized with NotI digestion and integrated at the *leu1* locus or linearized with MluI digestion  
453 and integrated at the *ars1* replication origin region upstream of the *hus5* gene. Plasmids  
454 expressing CFP fused Vps34, Atg6, Atg14, or Vps38, and 13Myc fused Vps15 under the  
455 control of the *4Inmt1* promoter were constructed using the pHIS3H vector (Matsuyama et al.,  
456 2008). The resulting pHIS3H-based plasmids were linearized with NotI digestion and  
457 integrated at the *his3* locus, except that pHIS3H-P41nmt1-CFP-vps34 was linearized with  
458 EcoRV and integrated at the *vps34* locus and pHIS3H-P41nmt1-13Myc-vps15 was linearized  
459 with Sall and integrated at the *vps15* locus.

460

#### 461 **Fluorescent microscopy**

462 Live-cell imaging was performed using a DeltaVision PersonalDV system (Applied Precision)  
463 equipped with an mCherry/YFP/CFP filter set (Chroma 89006 set). Images were acquired with  
464 a 100×, 1.4-NA objective using either a Photometrics CoolSNAP HQ2 CCD camera or a  
465 Photometrics Evolve 512 EMCCD camera, and analyzed with the SoftWoRx software (GE  
466 Healthcare Life Sciences).

467

#### 468 **Pil1 co-tethering assay**

469 Proteins analyzed by the Pil1 co-tethering assays were all expressed from plasmids integrated  
470 in the genome. Non-integrated episomal plasmids can cause variable expression levels and thus  
471 should be avoided. Pil1-mCherry-bait proteins were all expressed under the control of the  
472 *4Inmt1* promoter. This promoter is strong enough to generate robust fluorescence signal but  
473 not too strong to cause abnormal cell morphology and reduced growth rates that can result from  
474 strong overexpression of Pil1 (Kabeche et al., 2011). All the prey proteins were expressed from  
475 the *4Inmt1* promoter except for Atg9-YFP, which was expressed from the *nmt1* promoter.  
476 Analyzed strains were cultured to mid-log phase in the EMM medium with appropriate  
477 supplements at 30°C. To image the plasma membrane-associated filament-like structures

478 formed by Pill-mCherry-bait and its interactors, we acquired 5–7 optical Z-sections 0.2  $\mu\text{m}$   
479 apart so that at least in one Z-section the top or bottom plasma membrane was in focus. Then  
480 images were processed using the deconvolution algorithm of the SoftWoRx software. The  
481 top/bottom Z-section images were shown in most figures. In Fig. 1A and Fig. 3E,G, the mid-  
482 plane Z-section images were also shown.

483

#### 484 **Computation of the Pearson correlation coefficient (PCC)**

485 The Pearson correlation coefficient (PCC) (Dunn et al., 2011) was used to quantify the degree  
486 of colocalization between bait and prey. Imaging data from the corresponding experiments  
487 were analyzed using the Coloc 2 plugin of the Fiji distribution of the ImageJ software  
488 ([http://imagej.net/Coloc\\_2](http://imagej.net/Coloc_2)) (Schindelin et al., 2012). Individual cells in a deconvolved Z-  
489 section were outlined and selected as regions of interest (ROIs) using the freehand selection  
490 tool. After running the Coloc 2 plugin, Pearson's R value (no threshold) reported in the ImageJ  
491 Log window was recorded for each cell.

492

#### 493 **Calculation of buried surface area**

494 The buried surface area in a protein-protein interaction interface was calculated as the sum of  
495 the solvent accessible surface areas of the two protein monomers minus the solvent accessible  
496 surface area of the complex (Chen et al., 2013). The calculations of solvent accessible surface  
497 areas were performed using the website GETAREA (<http://curie.utmb.edu/getarea.html>) with  
498 water represented as a sphere with a radius of 1.4 Å (Fraczkiewicz and Braun, 1998). The  
499 individual PDB files submitted to GETAREA were generated by PyMOL based on the solved  
500 structure of the budding yeast PtdIns3K complex II (PDB 5DFZ) (Rostislavleva et al., 2015).

501

#### 502 **Pho8 $\Delta$ 60 assay in fission yeast**

503 Pho8 $\Delta$ 60 assay was performed as described previously (Yu et al., 2020). Briefly, five OD600  
504 units of cells were harvested and washed with 0.85% NaCl, and then suspended in 200  $\mu\text{l}$  of  
505 lysis buffer (20 mM PIPES, pH 6.8, 50 mM KCl, 100 mM KOAc, 10 mM MgSO<sub>4</sub>, 10  $\mu\text{M}$

506 ZnSO<sub>4</sub>, 0.5% Triton X-100, 2 mM PMSF (freshly added before use)) and incubated at room  
507 temperature for 20 min. PMSF was replenished to the final concentration of 4 mM and 0.5-  
508 mm-diameter glass beads were added to the samples. Then the cells were disrupted using a  
509 FastPrep-24 instrument. After centrifugation, 50 µl of the supernatant was added to 400 µl of  
510 reaction buffer (250 mM Tris-HCl, pH 8.5, 10 mM MgSO<sub>4</sub>, 10 µM ZnSO<sub>4</sub>, 0.4% Triton X-100,  
511 5.5 mM 1-naphthyl phosphate disodium salt) to start the reaction. Then samples were incubated  
512 at 30°C for 20 min before 500 µl of 1 M glycine-NaOH (pH 11.0) was added to stop the reaction.  
513 Fluorescence emission intensity at 472 nm with excitation at 345 nm was measured. Protein  
514 concentration was determined by the BCA method.

515

## 516 **Acknowledgments**

517 This work was supported by grants from the Ministry of Science and Technology of the  
518 People's Republic of China and the Beijing municipal government to L.-L.D.

519

## 520 **Disclosure statement**

521 The authors declare no conflict of interest.

522

## 523 **References**

524 Adler, J., and Parmryd, I. (2010). Quantifying colocalization by correlation: the Pearson  
525 correlation coefficient is superior to the Mander's overlap coefficient. *Cytom. Part J. Int. Soc.*  
526 *Anal. Cytol.* 77, 733–742.

527 Alberts, B. (1998). The Cell as a Collection of Protein Machines: Preparing the Next  
528 Generation of Molecular Biologists. *Cell* 92, 291–294.

529 Araki, Y., Ku, W.-C., Akioka, M., May, A.I., Hayashi, Y., Arisaka, F., Ishihama, Y., and  
530 Ohsumi, Y. (2013). Atg38 is required for autophagy-specific phosphatidylinositol 3-kinase  
531 complex integrity. *J. Cell Biol.* 203, 299–313.

532 Bähler, J., Wu, J.Q., Longtine, M.S., Shah, N.G., McKenzie, A., Steever, A.B., Wach, A.,  
533 Philippsen, P., and Pringle, J.R. (1998). Heterologous modules for efficient and versatile



534 PCR-based gene targeting in *Schizosaccharomyces pombe*. *Yeast* Chichester Engl. *14*, 943–  
535 951.

536 Baskaran, S., Carlson, L.-A., Stjepanovic, G., Young, L.N., Kim, D.J., Grob, P., Stanley,  
537 R.E., Nogales, E., and Hurley, J.H. (2014). Architecture and dynamics of the autophagic  
538 phosphatidylinositol 3-kinase complex. *ELife* *3*.

539 Blanchard, D., Hutter, H., Fleenor, J., and Fire, A. (2006). A differential cytolocalization  
540 assay for analysis of macromolecular assemblies in the eukaryotic cytoplasm. *Mol. Cell.*  
541 *Proteomics MCP* *5*, 2175–2184.

542 Chen, J., Sawyer, N., and Regan, L. (2013). Protein-protein interactions: general trends in the  
543 relationship between binding affinity and interfacial buried surface area. *Protein Sci. Publ.*  
544 *Protein Soc.* *22*, 510–515.

545 Dunn, K.W., Kamocka, M.M., and McDonald, J.H. (2011). A practical guide to evaluating  
546 colocalization in biological microscopy. *Am. J. Physiol.-Cell Physiol.* *300*, C723–C742.

547 Fields, S., and Song, O. (1989). A novel genetic system to detect protein-protein interactions.  
548 *Nature* *340*, 245–246.

549 Forsburg, S.L., and Rhind, N. (2006). Basic methods for fission yeast. *Yeast* *23*, 173–183.

550 Fraczekiewicz, R., and Braun, W. (1998). Exact and efficient analytical calculation of the  
551 accessible surface areas and their gradients for macromolecules. *J. Comput. Chem.* *19*, 319–  
552 333.

553 Fujioka, Y., Suzuki, S.W., Yamamoto, H., Kondo-Kakuta, C., Kimura, Y., Hirano, H.,  
554 Akada, R., Inagaki, F., Ohsumi, Y., and Noda, N.N. (2014). Structural basis of starvation-  
555 induced assembly of the autophagy initiation complex. *Nat. Struct. Mol. Biol.* *21*, 513–521.

556 Fukuda, T., Ebi, Y., Saigusa, T., Furukawa, K., Yamashita, S.-I., Inoue, K., Kobayashi, D.,  
557 Yoshida, Y., and Kanki, T. (2020). Atg43 tethers isolation membranes to mitochondria to  
558 promote starvation-induced mitophagy in fission yeast. *ELife* *9*.

559 Gallego, O., Specht, T., Brach, T., Kumar, A., Gavin, A.-C., and Kaksonen, M. (2013).  
560 Detection and characterization of protein interactions in vivo by a simple live-cell imaging  
561 method. *PloS One* *8*, e62195.



- 562 Galperin, E., Verkhusha, V.V., and Sorkin, A. (2004). Three-chromophore FRET microscopy  
563 to analyze multiprotein interactions in living cells. *Nat. Methods* *1*, 209–217.
- 564 Gavin, A.-C., and Superti-Furga, G. (2003). Protein complexes and proteome organization  
565 from yeast to man. *Curr. Opin. Chem. Biol.* *7*, 21–27.
- 566 Guardia, C.M., Tan, X.-F., Lian, T., Rana, M.S., Zhou, W., Christenson, E.T., Lowry, A.J.,  
567 Faraldo-Gómez, J.D., Bonifacino, J.S., Jiang, J., et al. (2020). Structure of Human ATG9A,  
568 the Only Transmembrane Protein of the Core Autophagy Machinery. *Cell Rep.* *31*, 107837.
- 569 Herce, H.D., Deng, W., Helma, J., Leonhardt, H., and Cardoso, M.C. (2013). Visualization  
570 and targeted disruption of protein interactions in living cells. *Nat. Commun.* *4*, 2660.
- 571 Hu, C.-D., and Kerppola, T.K. (2003). Simultaneous visualization of multiple protein  
572 interactions in living cells using multicolor fluorescence complementation analysis. *Nat.*  
573 *Biotechnol.* *21*, 539–545.
- 574 Itakura, E., Kishi, C., Inoue, K., and Mizushima, N. (2008). Beclin 1 Forms Two Distinct  
575 Phosphatidylinositol 3-Kinase Complexes with Mammalian Atg14 and UVRAG. *Mol. Biol.*  
576 *Cell* *19*, 5360–5372.
- 577 K, M., T, K., A, T., T, T., T, M., D, N., Y, S., N, N., S, I., Y, O., et al. (2020). Atg9 is a lipid  
578 scramblase that mediates autophagosomal membrane expansion. *Nat. Struct. Mol. Biol.*
- 579 Kabeche, R., Baldissard, S., Hammond, J., Howard, L., and Moseley, J.B. (2011). The  
580 filament-forming protein Pil1 assembles linear eisosomes in fission yeast. *Mol. Biol. Cell* *22*,  
581 4059–4067.
- 582 Kerppola, T.K. (2006). Visualization of molecular interactions by fluorescence  
583 complementation. *Nat. Rev. Mol. Cell Biol.* *7*, 449–456.
- 584 Li, J., Yu, Y., Suo, F., Sun, L.-L., Zhao, D., and Du, L.-L. (2014). Genome-wide Screens for  
585 Sensitivity to Ionizing Radiation Identify the Fission Yeast Nonhomologous End Joining  
586 Factor Xrc4. *G3 Genes Genomes Genet.* *4*, 1297–1306.
- 587 Liu, X.-M., Yamasaki, A., Du, X.-M., Coffman, V.C., Ohsumi, Y., Nakatogawa, H., Wu, J.-  
588 Q., Noda, N.N., and Du, L.-L. (2018). Lipidation-independent vacuolar functions of Atg8  
589 rely on its noncanonical interaction with a vacuole membrane protein. *ELife* *7*.

590 Lv, S., Miao, H., Luo, M., Li, Y., Wang, Q., Julie Lee, Y.-R., and Liu, B. (2017). CAPPI: A  
591 Cytoskeleton-Based Localization Assay Reports Protein-Protein Interaction in Living Cells  
592 by Fluorescence Microscopy. *Mol. Plant* *10*, 1473–1476.

593 Ma, M., Liu, J.-J., Li, Y., Huang, Y., Ta, N., Chen, Y., Fu, H., Ye, M.-D., Ding, Y., Huang,  
594 W., et al. (2017). Cryo-EM structure and biochemical analysis reveal the basis of the  
595 functional difference between human PI3KC3-C1 and -C2. *Cell Res.* *27*, 989–1001.

596 Maeda, S., Yamamoto, H., Kinch, L.N., Garza, C.M., Takahashi, S., Otomo, C., Grishin,  
597 N.V., Forli, S., Mizushima, N., and Otomo, T. (2020). Structure, lipid scrambling activity and  
598 role in autophagosome formation of ATG9A. *Nat. Struct. Mol. Biol.* 1–8.

599 Matsuhara, H., and Yamamoto, A. (2016). Autophagy is required for efficient meiosis  
600 progression and proper meiotic chromosome segregation in fission yeast. *Genes Cells* *21*, 65–  
601 87.

602 Matsuyama, A., Shirai, A., Yashiroda, Y., Kamata, A., Horinouchi, S., and Yoshida, M.  
603 (2004). pDUAL, a multipurpose, multicopy vector capable of chromosomal integration in  
604 fission yeast. *Yeast Chichester Engl.* *21*, 1289–1305.

605 Matsuyama, A., Shirai, A., and Yoshida, M. (2008). A novel series of vectors for  
606 chromosomal integration in fission yeast. *Biochem. Biophys. Res. Commun.* *374*, 315–319.

607 Miller, C.L., Arnold, M.M., Broering, T.J., Eichwald, C., Kim, J., Dinoso, J.B., and Nibert,  
608 M.L. (2007). Virus-derived platforms for visualizing protein associations inside cells. *Mol.*  
609 *Cell. Proteomics MCP* *6*, 1027–1038.

610 Mukaiyama, H., Kajiwara, S., Hosomi, A., Giga-Hama, Y., Tanaka, N., Nakamura, T., and  
611 Takegawa, K. (2009). Autophagy-deficient *Schizosaccharomyces pombe* mutants undergo  
612 partial sporulation during nitrogen starvation. *Microbiol. Read. Engl.* *155*, 3816–3826.

613 Nanji, T., Liu, X., Chew, L.H., Li, F.K., Biswas, M., Yu, Z.-Q., Lu, S., Dong, M.-Q., Du, L.-  
614 L., Klionsky, D.J., et al. (2017). Conserved and unique features of the fission yeast core Atg1  
615 complex. *Autophagy* *13*, 2018–2027.

616 Noda, T., and Klionsky, D.J. (2008). The quantitative Pho8Delta60 assay of nonspecific  
617 autophagy. *Methods Enzymol.* *451*, 33–42.

- 618 Noda, N.N., Ohsumi, Y., and Inagaki, F. (2010). Atg8-family interacting motif crucial for  
619 selective autophagy. *FEBS Lett.* *584*, 1379–1385.
- 620 Ohashi, Y., Soler, N., García Ortégón, M., Zhang, L., Kirsten, M.L., Perisic, O., Masson,  
621 G.R., Burke, J.E., Jakobi, A.J., Apostolakis, A.A., et al. (2016). Characterization of Atg38  
622 and NRBF2, a fifth subunit of the autophagic Vps34/PIK3C3 complex. *Autophagy* *12*, 2129–  
623 2144.
- 624 Pan, Z.-Q., Shao, G.-C., Liu, X.-M., Chen, Q., Dong, M.-Q., and Du, L.-L. (2020). Atg1  
625 kinase in fission yeast is activated by Atg11-mediated dimerization and cis-  
626 autophosphorylation. *ELife* *9*, e58073.
- 627 Rostislavleva, K., Soler, N., Ohashi, Y., Zhang, L., Pardon, E., Burke, J.E., Masson, G.R.,  
628 Johnson, C., Steyaert, J., Ktistakis, N.T., et al. (2015). Structure and flexibility of the  
629 endosomal Vps34 complex reveals the basis of its function on membranes. *Science* *350*,  
630 aac7365.
- 631 Schindelin, J., Arganda-Carreras, I., Frise, E., Kaynig, V., Longair, M., Pietzsch, T.,  
632 Preibisch, S., Rueden, C., Saalfeld, S., Schmid, B., et al. (2012). Fiji: an open-source  
633 platform for biological-image analysis. *Nat. Methods* *9*, 676–682.
- 634 Shyu, Y.J., Suarez, C.D., and Hu, C.-D. (2008). Visualization of AP-1–NF- $\kappa$ B ternary  
635 complexes in living cells by using a BiFC-based FRET. *Proc. Natl. Acad. Sci.* *105*, 151–156.
- 636 Sun, L.-L., Li, M., Suo, F., Liu, X.-M., Shen, E.-Z., Yang, B., Dong, M.-Q., He, W.-Z., and  
637 Du, L.-L. (2013). Global analysis of fission yeast mating genes reveals new autophagy  
638 factors. *PLoS Genet.* *9*, e1003715.
- 639 Suzuki, H., Kaizuka, T., Mizushima, N., and Noda, N.N. (2015). Structure of the Atg101-  
640 Atg13 complex reveals essential roles of Atg101 in autophagy initiation. *Nat. Struct. Mol.*  
641 *Biol.* *22*, 572–580.
- 642 Truong, K., and Ikura, M. (2001). The use of FRET imaging microscopy to detect protein-  
643 protein interactions and protein conformational changes in vivo. *Curr. Opin. Struct. Biol.* *11*,  
644 573–578.
- 645 Young, L.N., Cho, K., Lawrence, R., Zoncu, R., and Hurley, J.H. (2016). Dynamics and

646 architecture of the NRBF2-containing phosphatidylinositol 3-kinase complex I of autophagy.  
647 Proc. Natl. Acad. Sci. *113*, 8224–8229.

648 Young, L.N., Goerdeler, F., and Hurley, J.H. (2019). Structural pathway for allosteric  
649 activation of the autophagic PI 3-kinase complex I. Proc. Natl. Acad. Sci. U. S. A. *116*,  
650 21508–21513.

651 Yu, Z.-Q., Sun, L.-L., Jiang, Z.-D., Liu, X.-M., Zhao, D., Wang, H.-T., He, W.-Z., Dong, M.-  
652 Q., and Du, L.-L. (2020). Atg38-Atg8 interaction in fission yeast establishes a positive  
653 feedback loop to promote autophagy. *Autophagy* *16*, 2036–2051.

654 Yurlova, L., Derks, M., Buchfellner, A., Hickson, I., Janssen, M., Morrison, D., Stansfield, I.,  
655 Brown, C.J., Ghadessy, F.J., Lane, D.P., et al. (2014). The fluorescent two-hybrid assay to  
656 screen for protein-protein interaction inhibitors in live cells: targeting the interaction of p53  
657 with Mdm2 and Mdm4. *J. Biomol. Screen.* *19*, 516–525.

658 Zhang, J., and Lautar, S. (1996). A yeast three-hybrid method to clone ternary protein  
659 complex components. *Anal. Biochem.* *242*, 68–72.

660 Zhao, D., Liu, X.-M., Yu, Z.-Q., Sun, L.-L., Xiong, X., Dong, M.-Q., and Du, L.-L. (2016).  
661 Atg20- and Atg24-family proteins promote organelle autophagy in fission yeast. *J. Cell Sci.*  
662 *129*, 4289–4304.

663 Zhao, D., Zou, C.-X., Liu, X.-M., Jiang, Z.-D., Yu, Z.-Q., Suo, F., Du, T.-Y., Dong, M.-Q.,  
664 He, W., and Du, L.-L. (2020). A UPR-Induced Soluble ER-Phagy Receptor Acts with VAPs  
665 to Confer ER Stress Resistance. *Mol. Cell* *79*, 963-977.e3.

666 Zolghadr, K., Mortusewicz, O., Rothbauer, U., Kleinhans, R., Goehler, H., Wanker, E.E.,  
667 Cardoso, M.C., and Leonhardt, H. (2008). A fluorescent two-hybrid assay for direct  
668 visualization of protein interactions in living cells. *Mol. Cell. Proteomics MCP* *7*, 2279–2287.

669  
670  
671  
672

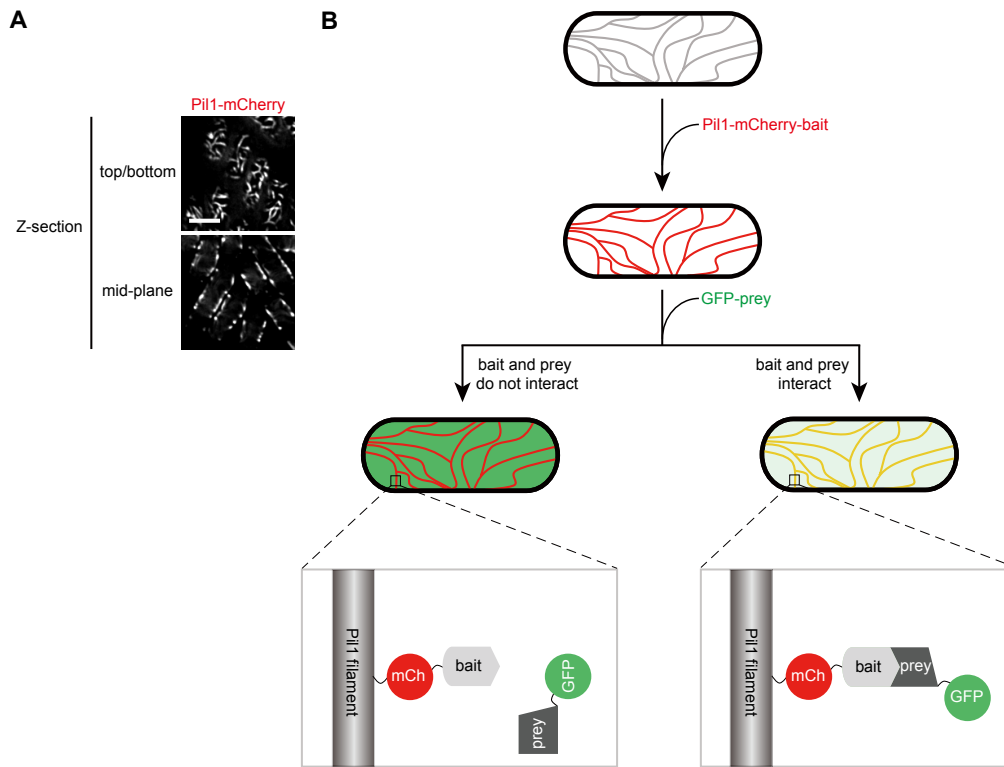

673

674 **Fig. 1. Basic design of the Pil1 co-tethering assay.** (A) Localization of Pil1-mCherry in  
675 fission yeast. Images shown are deconvolved single optical sections, with one focused on the  
676 top (or bottom) of the cells, and the other focused in the mid-plane of the cells. Scale bar, 5  $\mu$ m.  
677 (B) A schematic of how the Pil1 co-tethering assay detects the interaction between bait and  
678 prey. The Pil1-mCherry-fused bait protein localizes to the Pil1 filaments in the cell cortex. If  
679 the GFP-fused prey protein interacts with the bait protein, the GFP signal colocalizes with the  
680 mCherry signal on the Pil1 filaments.

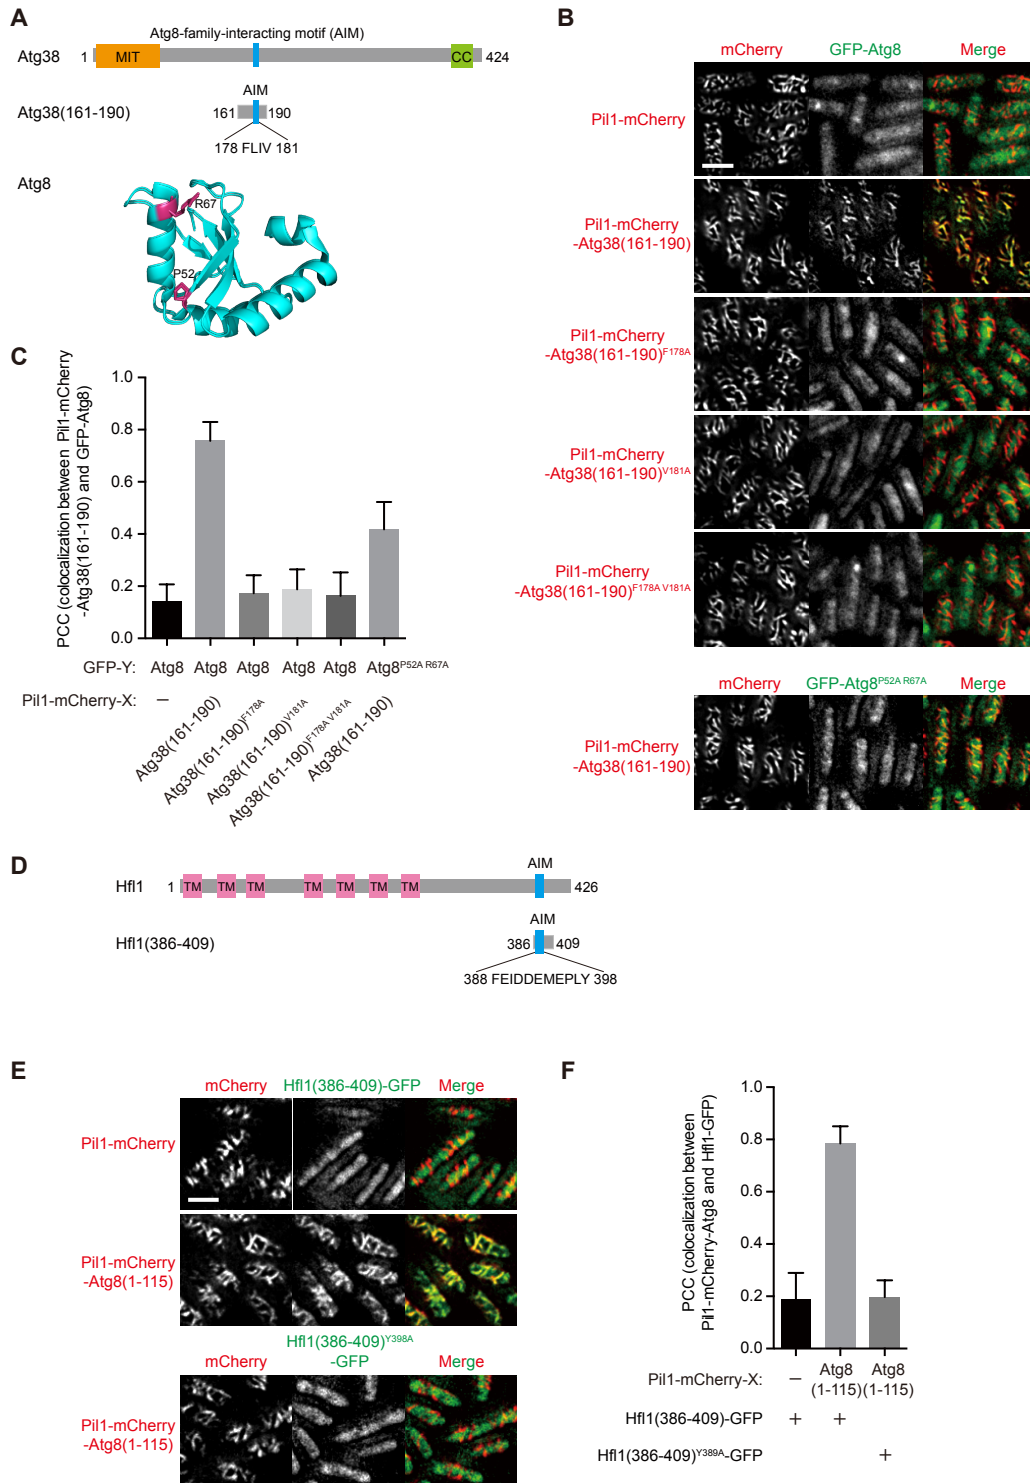

681

682 **Fig. 2. Detection of interactions between Atg8 and Atg8-interacting proteins using the**  
 683 **Pil1 co-tethering assay. (A) Domain organization of Atg38 and the structure of Atg8. MIT,**  
 684 **microtubule interacting and trafficking domain. CC, coiled-coil domain. AIM, Atg8-family-**

685 interacting motif. The structure of Atg8 (PDB 6AAF, chain A) is shown as a ribbon diagram  
686 with Pro52 and Arg67 highlighted in pink. (B) Atg38(161-190) interacts with Atg8 in the Pil1  
687 co-tethering assay, and this interaction is blocked by the AIM mutations in Atg38(161-190)  
688 and diminished by the AIM-binding region mutation in Atg8. (C) Imaging data from the  
689 experiments shown in (B) were analyzed and the PCC values are presented as mean  $\pm$  s.d. (10  
690 cells). (D) Domain organization of Hfl1. TM, transmembrane domain. (E) Atg8 interacts with  
691 Hfl1(386-409) in the Pil1 co-tethering assay, and this interaction is blocked by the AIM  
692 mutation in Hfl1(386-409). (F) Imaging data from the experiments shown in (E) were analyzed  
693 and the PCC values are presented as mean  $\pm$  s.d. (10 cells). Scale bars, 5  $\mu$ m.



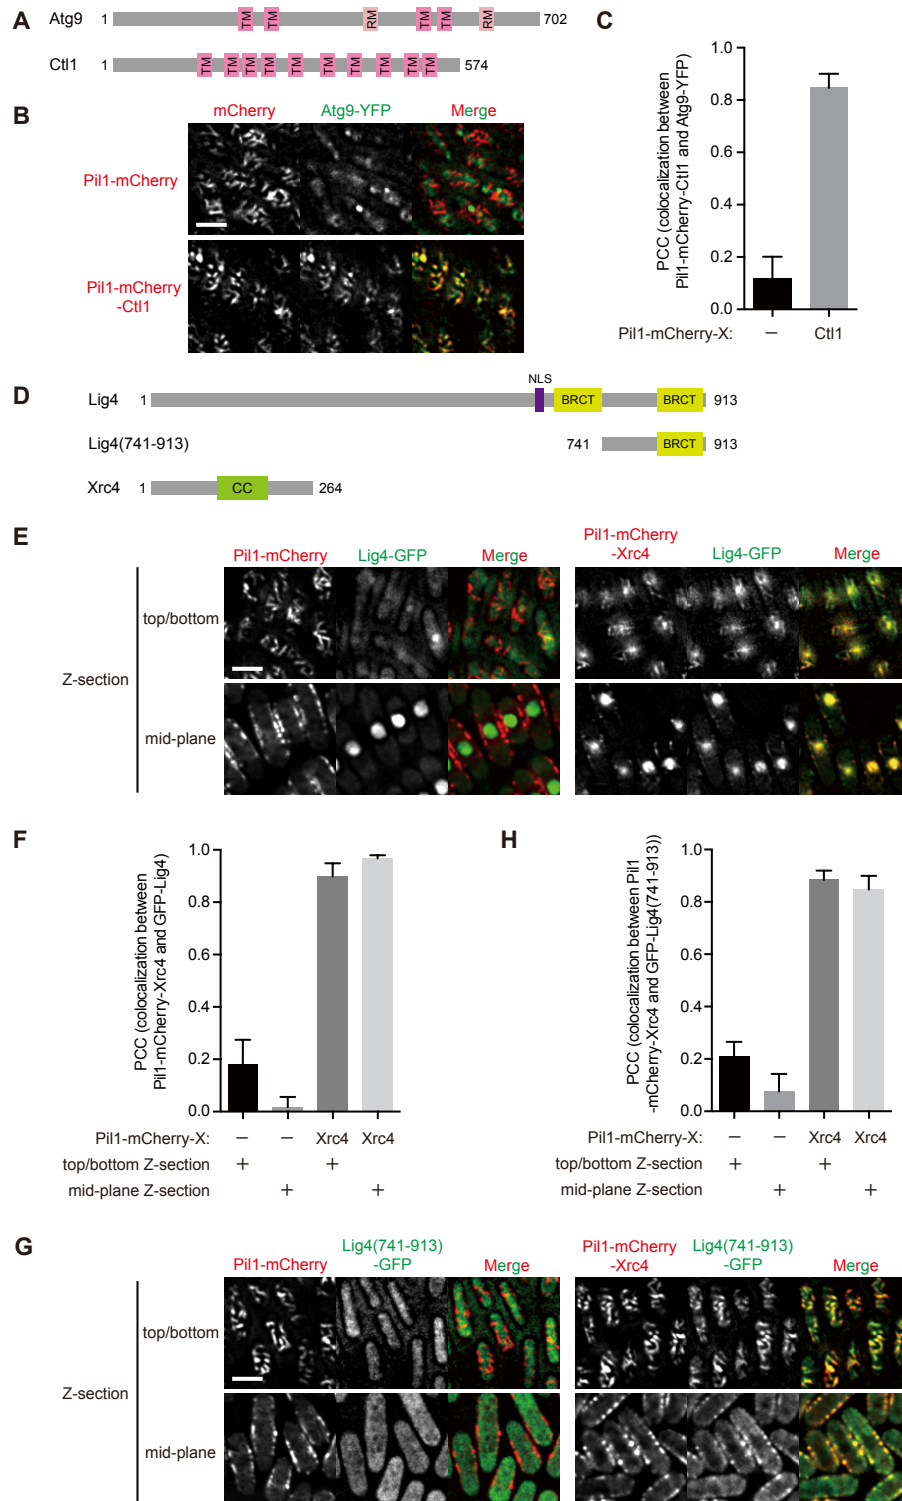

694

695 **Fig. 3. Detection of interactions between transmembrane proteins and interactions**

696 **between nuclear proteins using the Pil1 co-tethering assay. (A) Domain organization of**

697 **Atg9 and Ctl1. TM, transmembrane domain. RM, reentrant membrane domain. (B) Ctl1**



698 interacts with Atg9 in the Pil1 co-tethering assay. (C) Imaging data from the experiments shown  
699 in (B) were analyzed and the PCC values are presented as mean  $\pm$  s.d. (10 cells). (D) Domain  
700 organization of Lig4 and Xrc4. NLS, nuclear localization signal. BRCT, BRCT domain. CC,  
701 coiled-coil domain. (E) Xrc4 interacts with Lig4 in the Pil1 co-tethering assay. (F) Imaging  
702 data from the experiments shown in (E) were analyzed and the PCC values are presented as  
703 mean  $\pm$  s.d. (10 cells). (G) Xrc4 interacts with Lig4(741-913) in the Pil1 co-tethering assay. (H)  
704 Imaging data from the experiments shown in (G) were analyzed and the PCC values are  
705 presented as mean  $\pm$  s.d. (10 cells). Scale bars, 5  $\mu$ m.

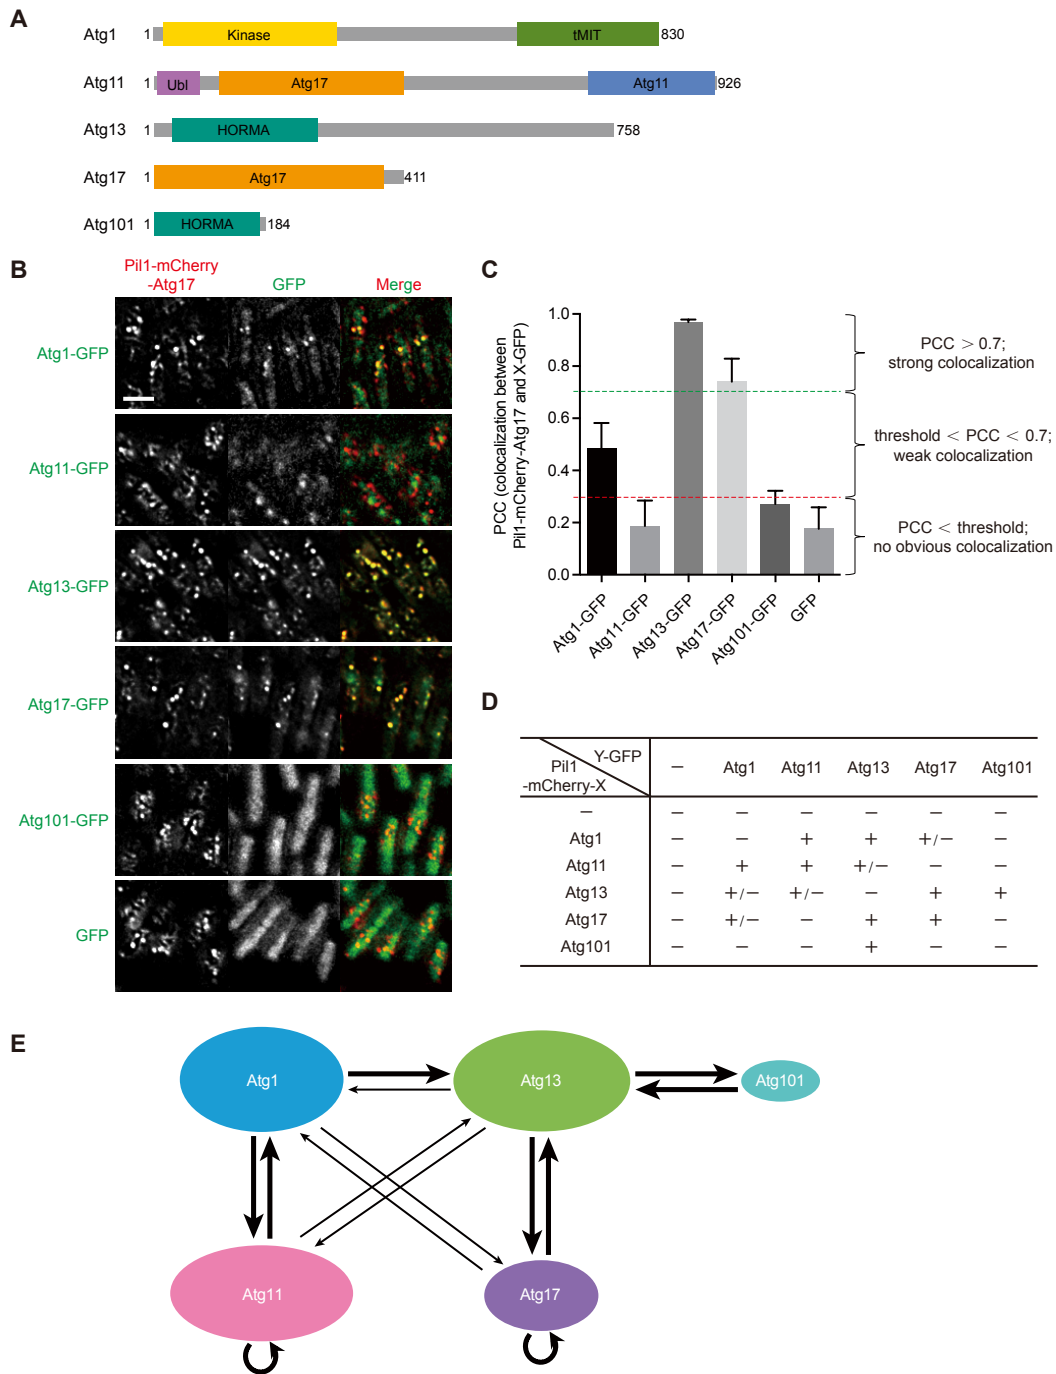

706

707 **Fig. 4. Mapping the interactions among subunits of the Atg1 complex using the Pil1 co-**

708 **tethering assay. (A) Domain organization of subunits of the Atg1 complex. Kinase, kinase**

709 **domain. tMIT, tandem MIT domain. Ubl, ubiquitin-like domain. Atg17, Atg17 domain. Atg11,**

710 **Atg11 domain. HORMA, HORMA domain. CC, coiled-coil domain. (B) Detection of**

711 **interactions between Atg17 and subunits of the Atg1 complex using the Pil1 co-tethering assay.**

712 Scale bar, 5  $\mu$ m. (C) Imaging data from the experiments shown in (B) were analyzed and the  
713 PCC values are presented as mean  $\pm$  s.d. (10 cells). (D) Summary of the interactions among  
714 subunits of the Atg1 complex revealed by the Pil1 co-tethering assay. “+” denotes a strong  
715 colocalization with the PCC value greater than 0.7. “+/-” denotes a weak colocalization with  
716 the PCC values less than 0.7 and greater than a threshold value, which is either 0.3 or the PCC  
717 value obtained using free GFP as prey plus 0.05, whichever number is greater. “-” denotes lack  
718 of colocalization with the PCC value less than 0.3. (E) A diagram of protein-protein interaction  
719 relationship among subunits of the Atg1 complex revealed by the Pil1 co-tethering assay. The  
720 arrow starts from a bait protein and points at a prey protein. The thick arrow denotes a strong  
721 colocalization, and the thin arrow denotes a weak colocalization.

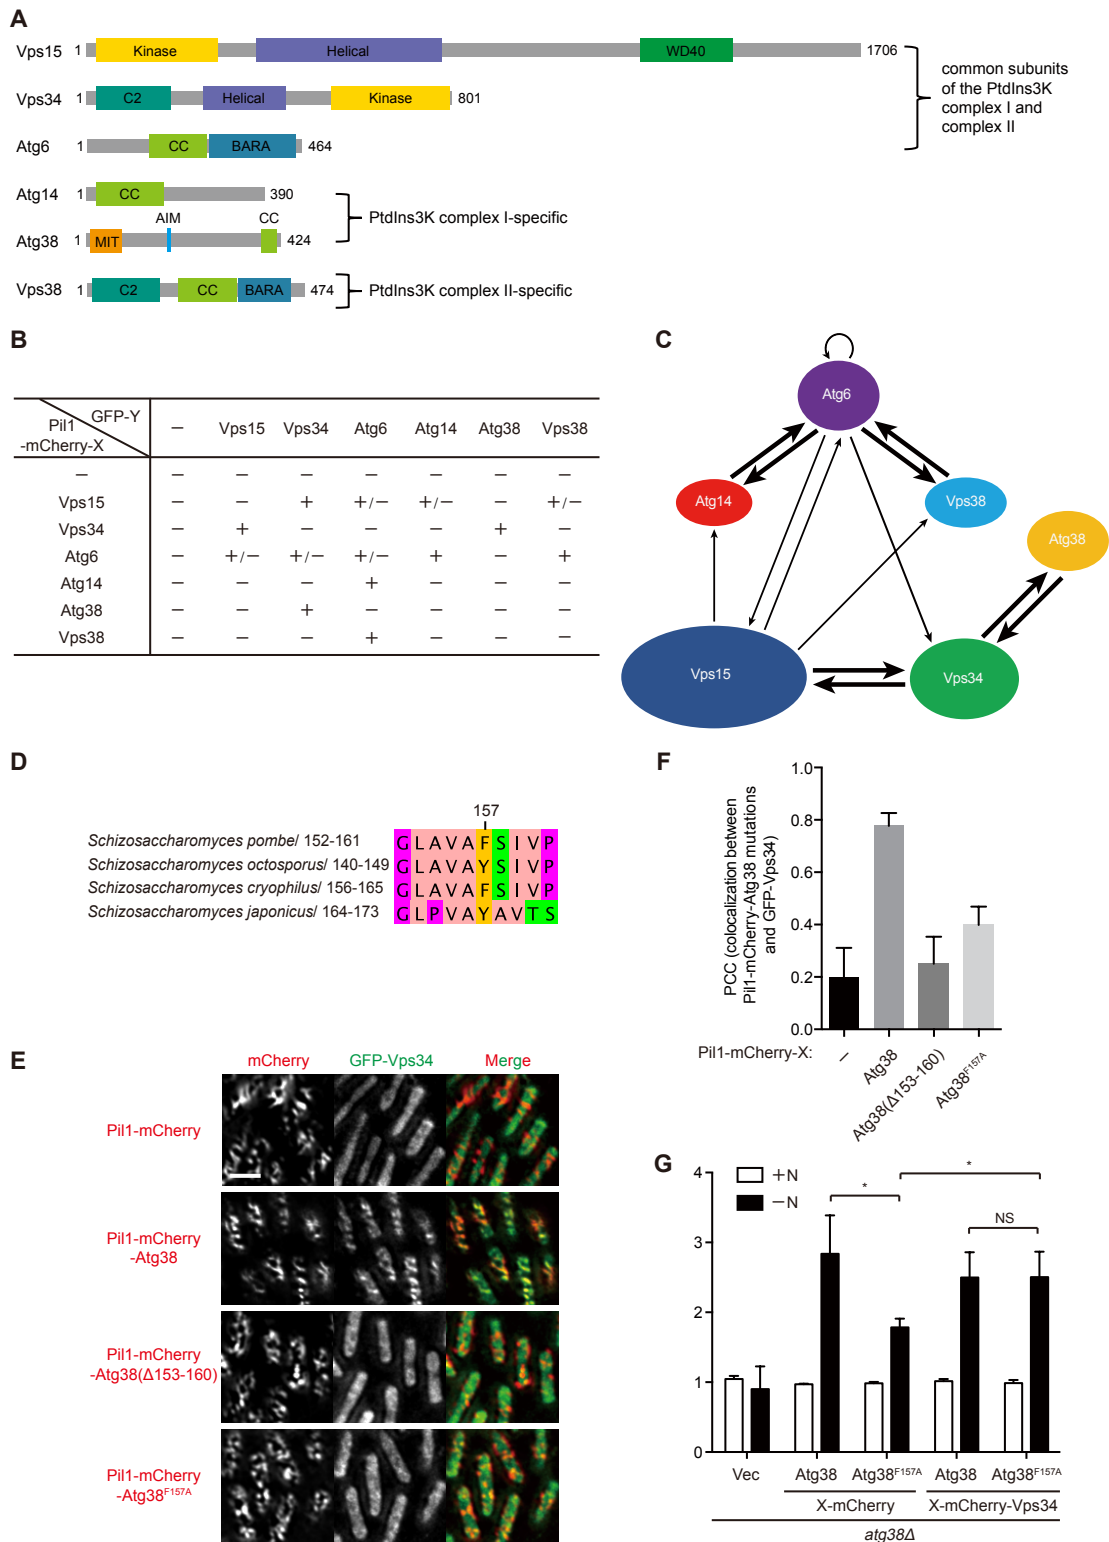

722

723 **Fig. 5. Mapping the interactions among subunits of PtdIns3K complexes using the Pil1**  
 724 **co-tethering assay. (A) Domain organization of subunits of the two PtdIns3K complexes.**

725 Kinase, kinase domain. Helical, helical domain. WD40, WD40 domain. C2, C2 domain. CC,  
726 coiled-coil domain. BARA, beta-alpha repeated, autophagy-specific domain. MIT, microtubule  
727 interacting and trafficking domain. (B) Summary of the interactions among subunits of  
728 PtdIns3K complexes revealed by the Pil1 co-tethering assay. “+” denotes a strong  
729 colocalization. “+/-” denotes a weak colocalization. “-” denotes no obvious colocalization. (C)  
730 A diagram of protein-protein interaction relationship among subunits of PtdIns3K complexes  
731 revealed by the Pil1 co-tethering assay. The arrow starts from a bait protein and points at a prey  
732 protein. The thick arrow denotes a strong colocalization, and the thin arrow denotes a weak  
733 colocalization. (D) A region of Atg38 conserved among *S. pombe*, *S. octosporus*, *S. cryophilus*,  
734 and *S. japonicus*. (E) F157 in Atg38 is important for its interaction with Vps34 in the Pil1 co-  
735 tethering assay. (F) Imaging data from the experiments shown in (E) were analyzed and the  
736 PCC values are presented as mean  $\pm$  s.d. (10 cells). (G) Autophagic flux measurement using  
737 the Pho8 $\Delta$ 60 assay was performed in *atg38 $\Delta$*  cells transformed with an empty vector or a  
738 plasmid expressing wild-type Atg38, Atg38<sup>F157A</sup>, wild-type Atg38 fused with Vps34, or  
739 Atg38<sup>F157A</sup> fused with Vps34. Cells were collected before (+N) and after culturing in nitrogen-  
740 free medium for 4 h (-N). Average activity from non-starved (+N) samples was set to 1. Data  
741 are mean  $\pm$  s.d. of triplicates from representative experiments. \* indicates  $P < 0.05$ ; NS, not  
742 significant.  $P$  values were calculated using Welch’s t-test. Scale bars, 5  $\mu$ m.

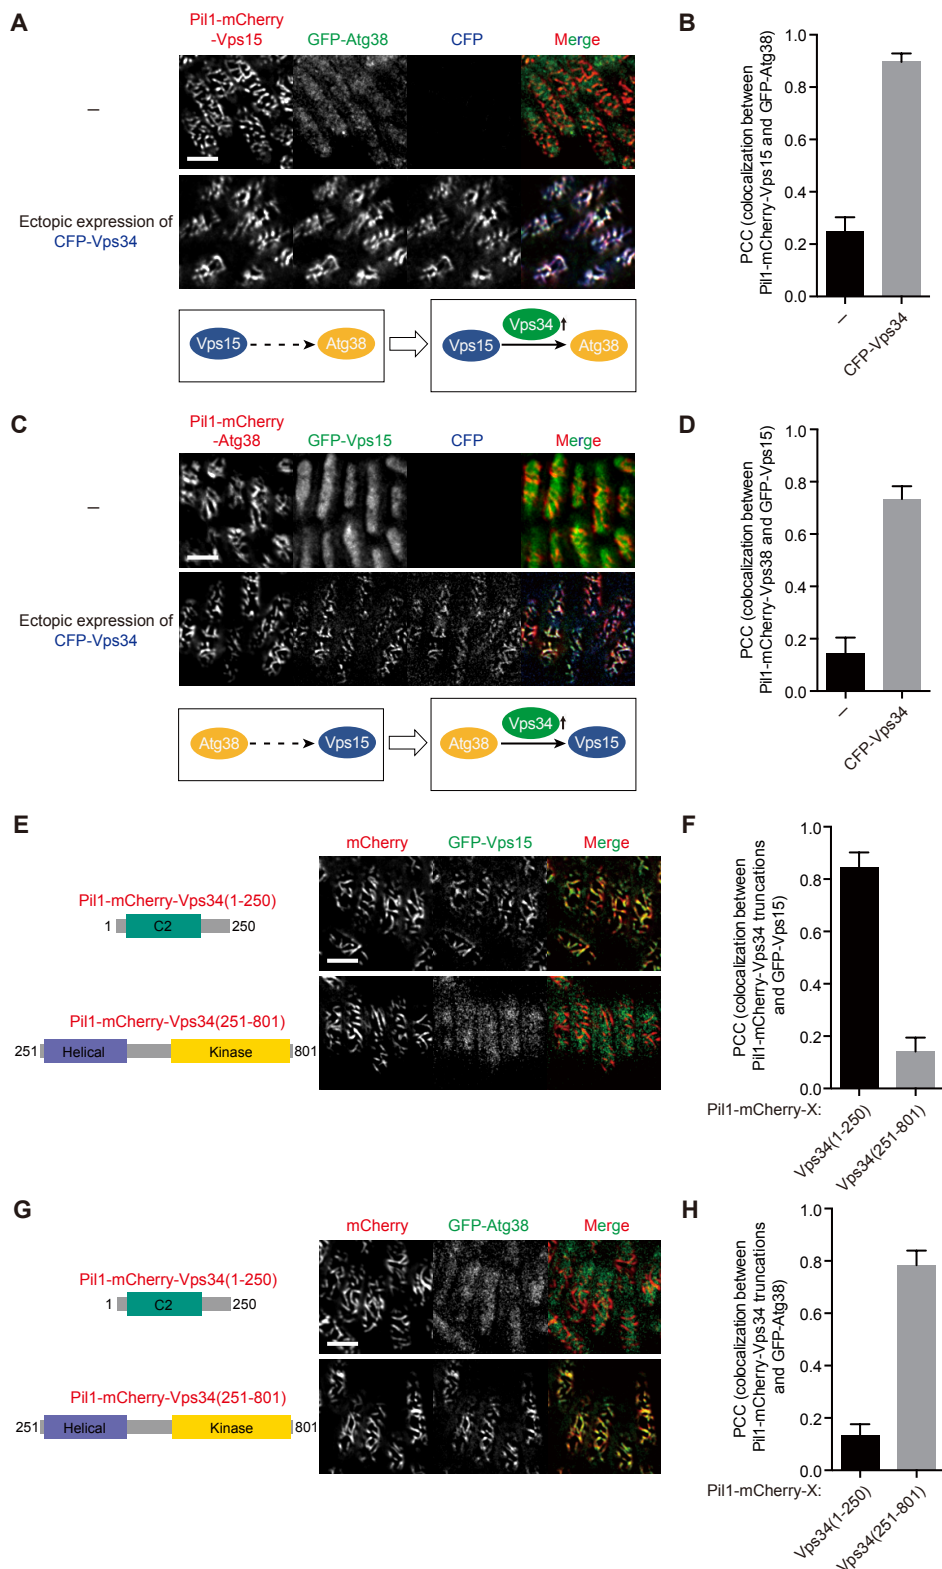

743

744 **Fig. 6. Analyzing the ternary Vps15-Vps34-Atg38 interaction using the Pil1 co-tethering**

745 **assay. (A) Ectopic expression of Vps34 led to the colocalization of Pil1-mCherry-Vps15 and**

746 GFP-Atg38 in the Pil1 co-tethering assay. (B) Imaging data from the experiments shown in (A)  
747 were analyzed and the PCC values are presented as mean  $\pm$  s.d. (10 cells). (C) Ectopic  
748 expression of Vps34 led to the colocalization of Pil1-mCherry-Atg38 and GFP-Vps15 in the  
749 Pil1 co-tethering assay. (D) Imaging data from the experiments shown in (C) were analyzed  
750 and the PCC values are presented as mean  $\pm$  s.d. (10 cells). (E) Vps15 colocalized with the N-  
751 terminal region, but not the C-terminal region of Vps34 in the Pil1 co-tethering assay. (F)  
752 Imaging data from the experiments shown in (E) were analyzed and the PCC values are  
753 presented as mean  $\pm$  s.d. (10 cells). (G) Atg38 colocalized with the C-terminal region, but not  
754 the N-terminal region of Vps34 in the Pil1 co-tethering assay. (H) Imaging data from the  
755 experiments shown in (G) were analyzed and the PCC values are presented as mean  $\pm$  s.d. (10  
756 cells). Scale bars, 5  $\mu$ m.

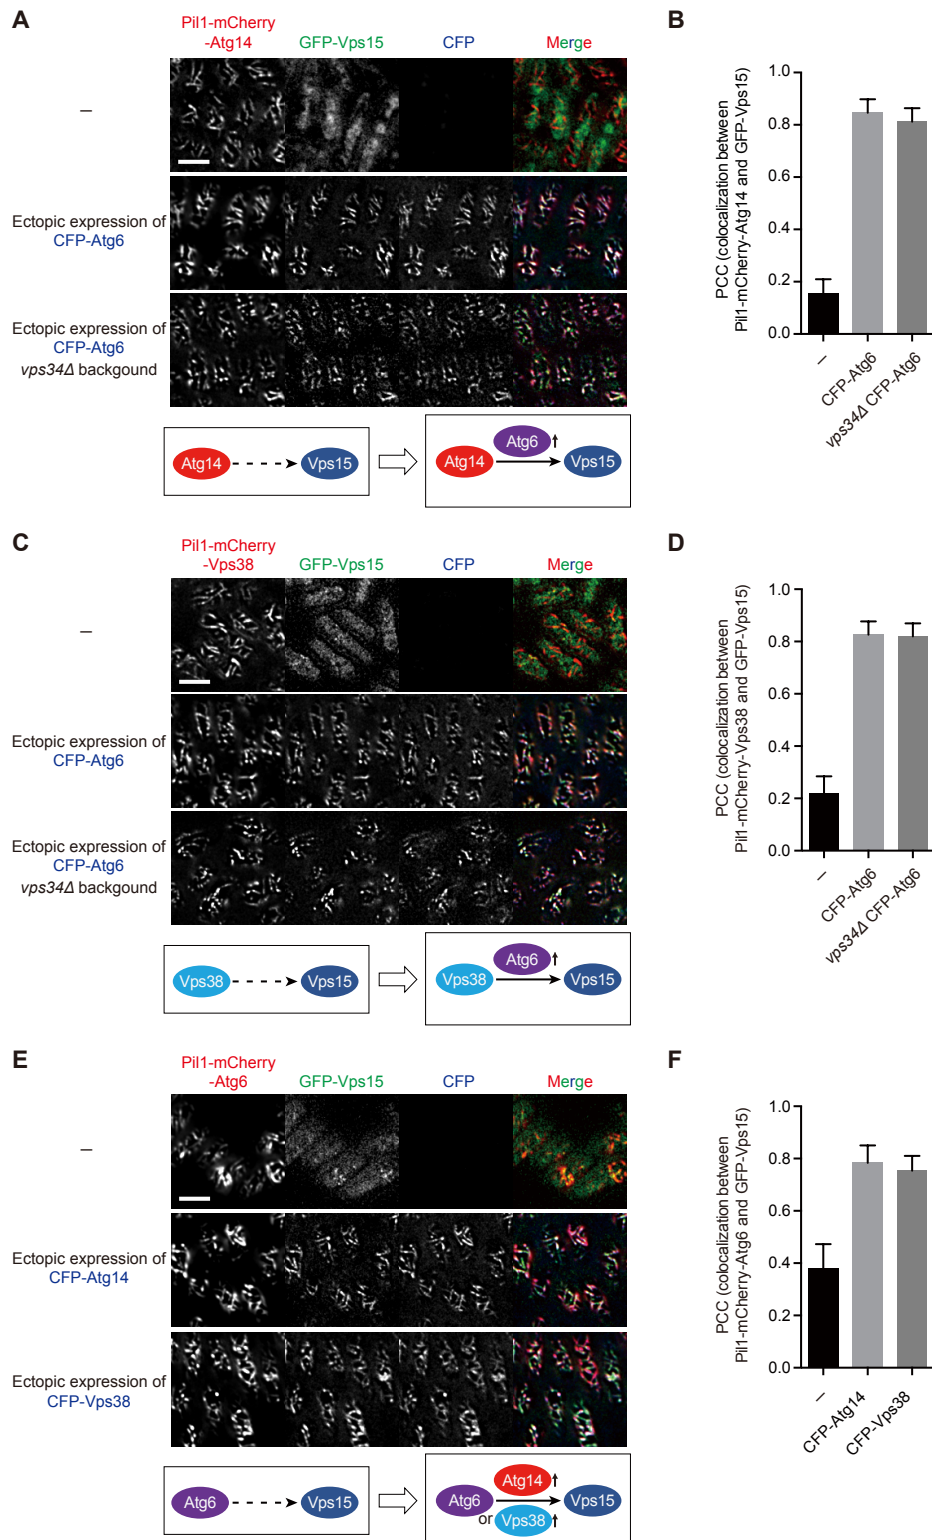

757

758 **Fig. 7. Analyzing the ternary Atg14-Atg6-Vps15 interaction and the ternary Atg14-**  
 759 **Vps38-Vps15 interaction.** (A) Ectopic expression of Atg6 led to the colocalization of Atg14



760 and Vps15, and this colocalization is independent of Vps34. (B) Imaging data from the  
761 experiments shown in (A) were analyzed and the PCC values are presented as mean  $\pm$  s.d. (10  
762 cells). (C) Ectopic expression of Atg6 led to the colocalization of Vps38 and Vps15, and this  
763 colocalization is independent of Vps34. (D) Imaging data from the experiments shown in (C)  
764 were analyzed and the PCC values are presented as mean  $\pm$  s.d. (10 cells). (E) Ectopic  
765 expression of Atg14 or Vps38 enhanced the colocalization of Atg6 and Vps15. (F) Imaging  
766 data from the experiments shown in (E) were analyzed and the PCC values are presented as  
767 mean  $\pm$  s.d. (10 cells). Scale bars, 5  $\mu$ m.

768

769

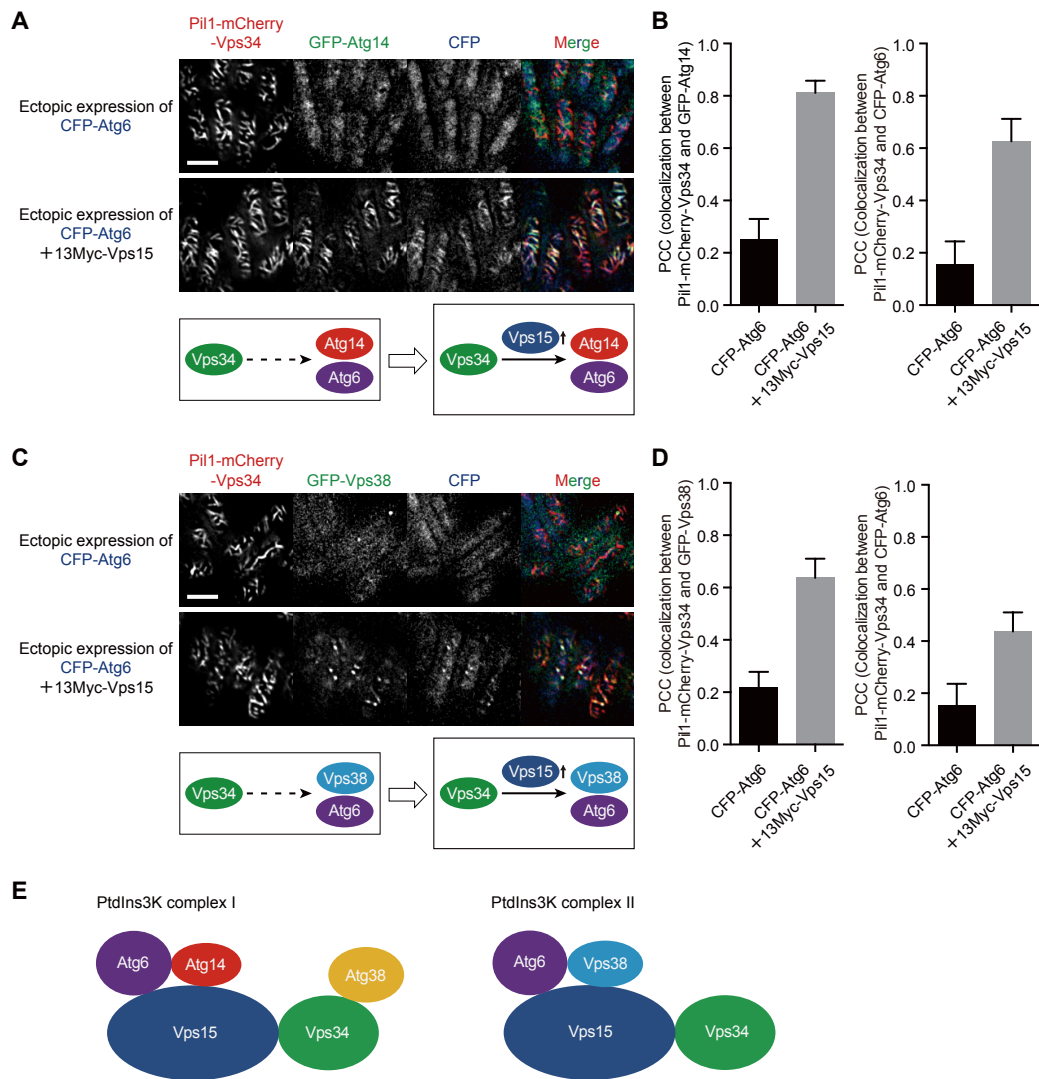

770

771 **Fig. 8. Vps15 bridges the interactions between Vps34 and the Atg14-Atg6 subcomplex**

772 **and the interactions between Vps34 and the Vps38-Atg6 subcomplex.** (A) Ectopic

773 expression of Vps15 led to the colocalization of Vps34 and the Atg14-Atg6 pair in the Pil1 co-

774 tethering assay. (B) Imaging data from the experiments shown in (A) were analyzed and the

775 PCC values are presented as mean  $\pm$  s.d. (10 cells). (C) Ectopic expression of Vps15 led to the

776 colocalization of Vps34 and the Vps38-Atg6 pair in the Pil1 co-tethering assay. (D) Imaging

777 data from the experiments shown in (C) were analyzed and the PCC values are presented as

778 mean  $\pm$  s.d. (10 cells). (E) Model of the organization of the PtdIns3K complex I and the

779 PtdIns3K complex II in fission yeast. Scale bars, 5  $\mu$ m.

780 **Supplementary Information**

781

782

783

784 **Visual detection of binary, ternary, and quaternary**  
785 **protein-protein interactions in fission yeast by Pil1**  
786 **co-tethering assay**

787

788 Zhong-Qiu Yu, Xiao-Man Liu, Dan Zhao, Dan-Dan Xu, Li-Lin Du

789

790

791

792

793

794

795

796

797 TABLE OF CONTENTS

798

---

|     |                 |    |
|-----|-----------------|----|
| 799 | Figure S1 ..... | 40 |
| 800 | Figure S2 ..... | 41 |
| 801 | Figure S3 ..... | 43 |
| 802 | Figure S4 ..... | 44 |
| 803 | Figure S5 ..... | 45 |
| 804 | Figure S6 ..... | 47 |
| 805 | Figure S7 ..... | 49 |
| 806 | Figure S8 ..... | 51 |
| 807 | Table S1 .....  | 53 |
| 808 | Table S2 .....  | 61 |

---

809

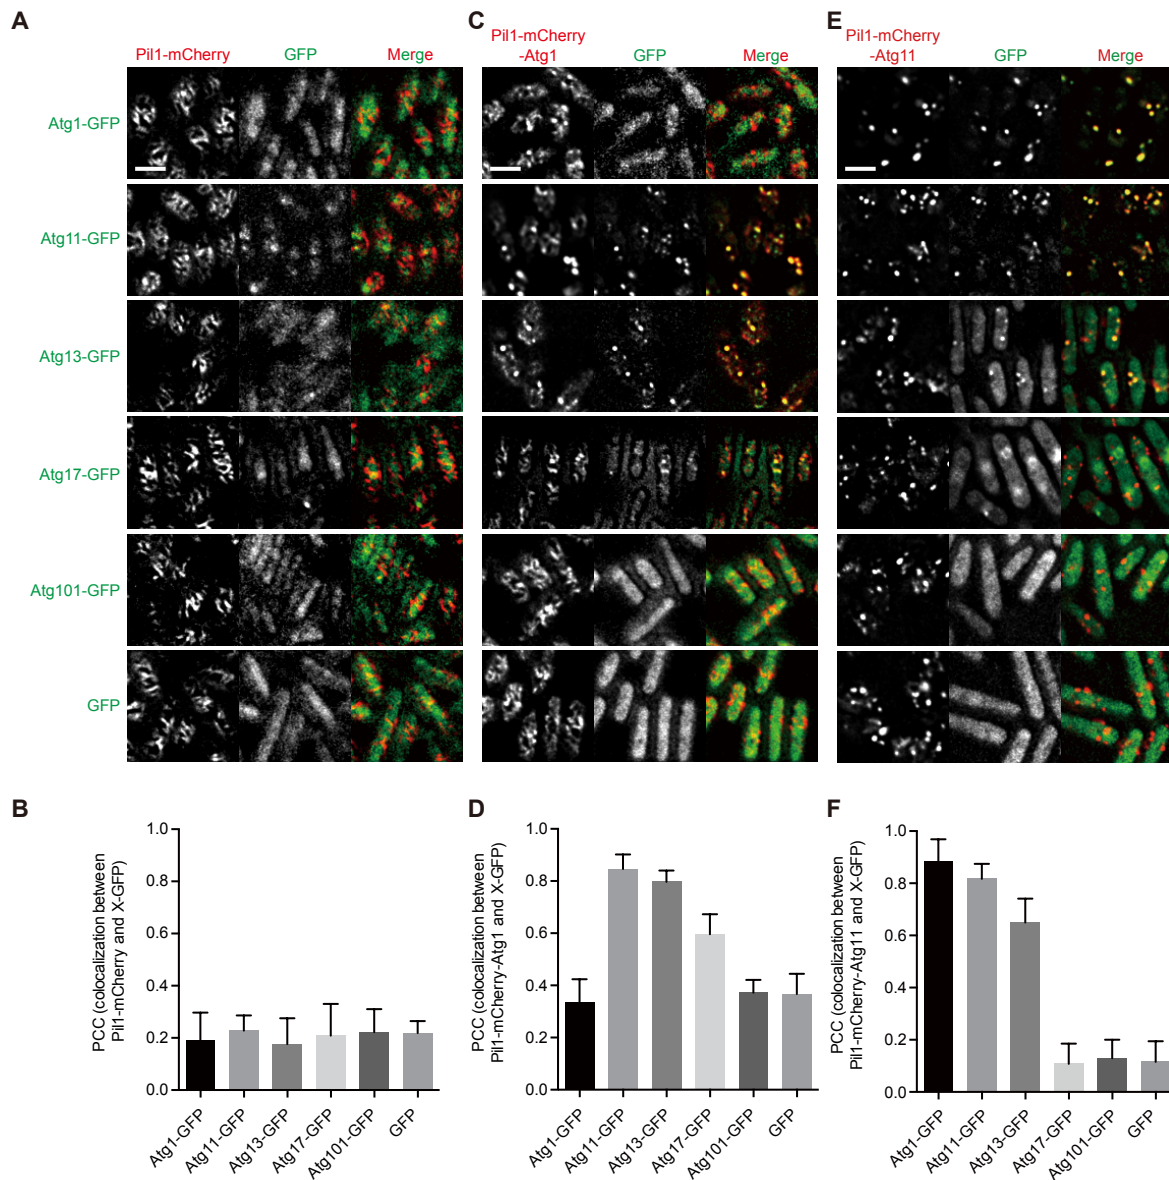

810

811 **Figure S1. Pil1 co-tethering assay using Atg1 and Atg11 as bait and subunits of the Atg1**

812 **complex as prey.** (A) Experiments using Pil1-mCherry as a negative control bait. (B) Imaging

813 data from the experiments shown in (A) were analyzed and the PCC values are presented as

814 mean  $\pm$  s.d. (10 cells). (C) Experiments using the Pil-mCherry-Atg1 bait. (D) Imaging data

815 from the experiments shown in (C) were analyzed and the PCC values are presented as mean

816  $\pm$  s.d. (10 cells). (E) Experiments using the Pil-mCherry-Atg11 bait. (F) Imaging data from the

817 experiments shown in (E) were analyzed and the PCC values are presented as mean  $\pm$  s.d. (10

818 cells). Scale bars, 5  $\mu$ m.

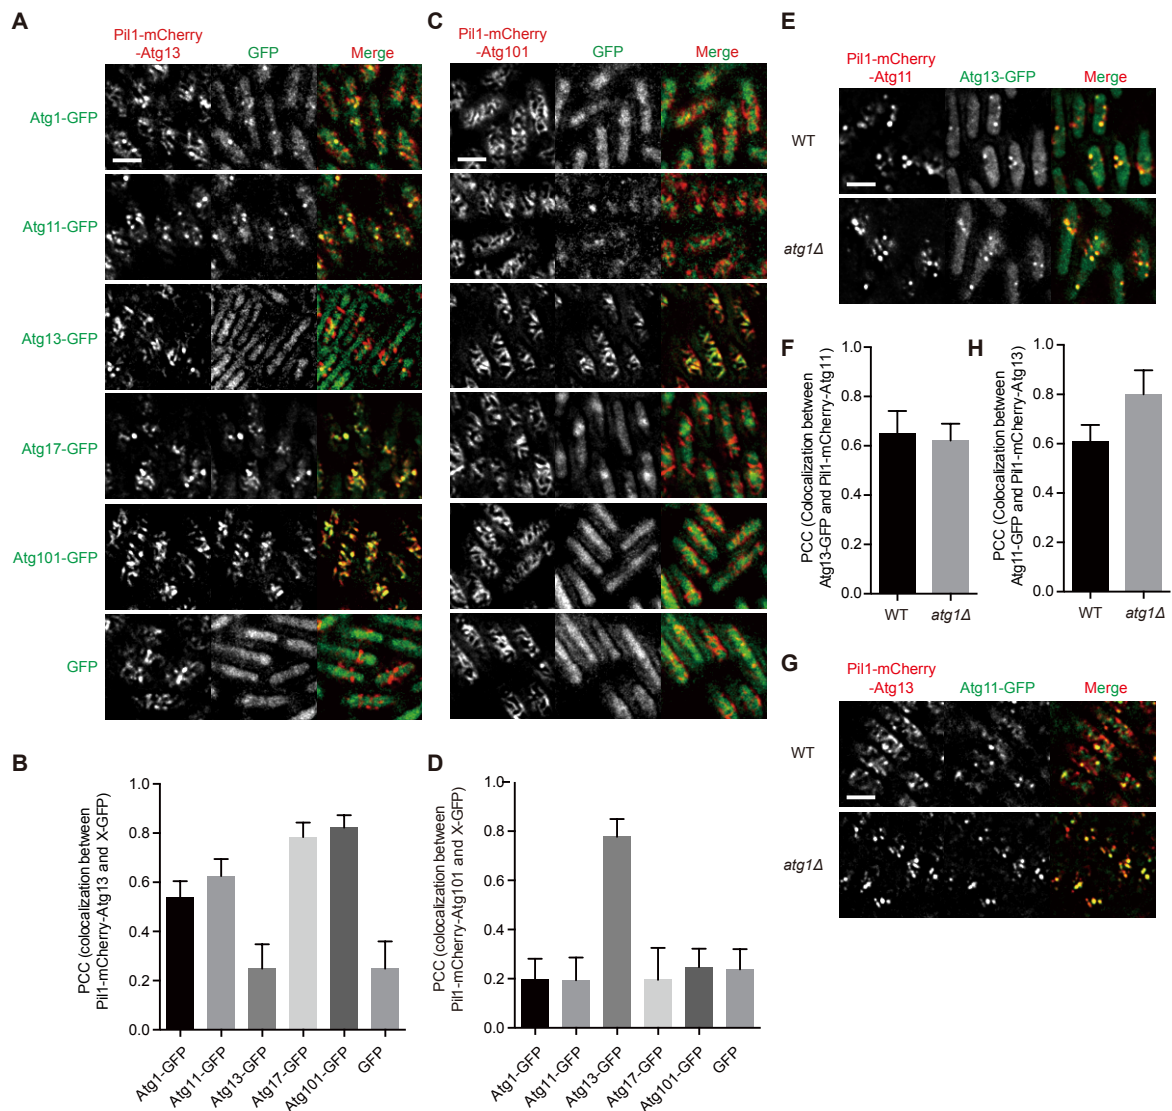

819

820 **Figure S2. Pil1 co-tethering assay using Atg13 and Atg101 as bait and subunits of the**

821 **Atg1 complex as prey, and the experiments showing that the interaction between Atg11**

822 **and Atg13 is independent of Atg1. (A) Experiments using the Pil-mCherry-Atg13 bait. (B)**

823 **Imaging data from the experiments shown in (A) were analyzed and the PCC values are**

824 **presented as mean ± s.d. (10 cells). (C) Experiments using the Pil-mCherry-Atg101 bait. (D)**

825 **Imaging data from the experiments shown in (C) were analyzed and the PCC values are**

826 **presented as mean ± s.d. (10 cells). (E) The deletion of *atg1* did not affect the interaction**

827 **between Atg11 and Atg13 when using Atg11 as bait. (F) Imaging data from the experiments**

828 **shown in (E) were analyzed and the PCC values are presented as mean ± s.d. (10 cells). (G)**

829 The deletion of *atg1* did not affect the interaction between Atg11 and Atg13 when using Atg13  
830 as bait. (H) Imaging data from the experiments shown in (G) were analyzed and the PCC values  
831 are presented as mean  $\pm$  s.d. (10 cells). Scale bars, 5  $\mu$ m.

832

833

834

835



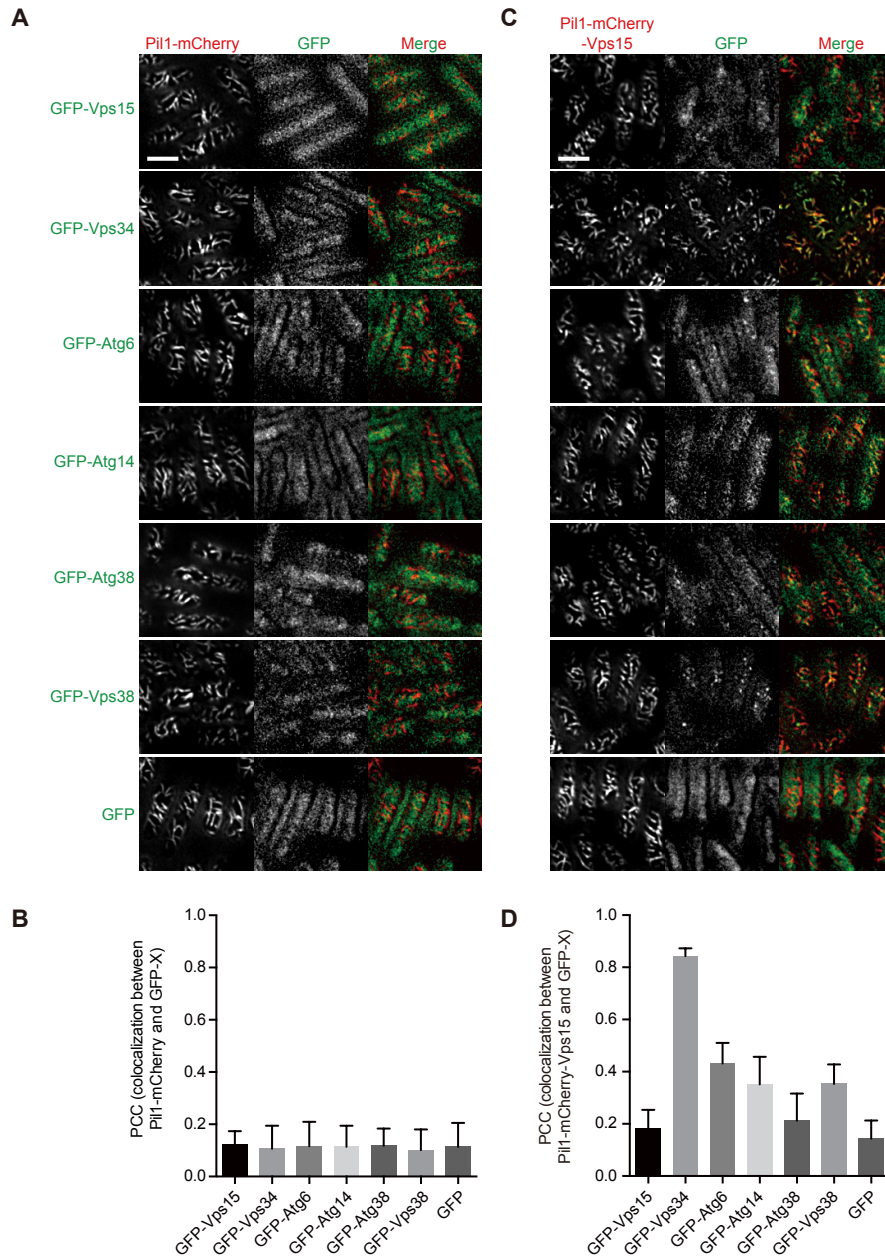

836

837 **Figure S3. Pil1 co-tethering assay using Vps15 as bait and subunits of PtdIns3K**

838 **complexes as prey.** (A) Experiments using Pil1-mCherry as a negative control bait. (B)

839 Imaging data from the experiments shown in (A) were analyzed and the PCC values are

840 presented as mean ± s.d. (10 cells). (C) Experiments using Pil1-mCherry-Vps15 as bait. (D)

841 Imaging data from the experiments shown in (C) were analyzed and the PCC values are

842 presented as mean ± s.d. (10 cells). Scale bars, 5 μm.



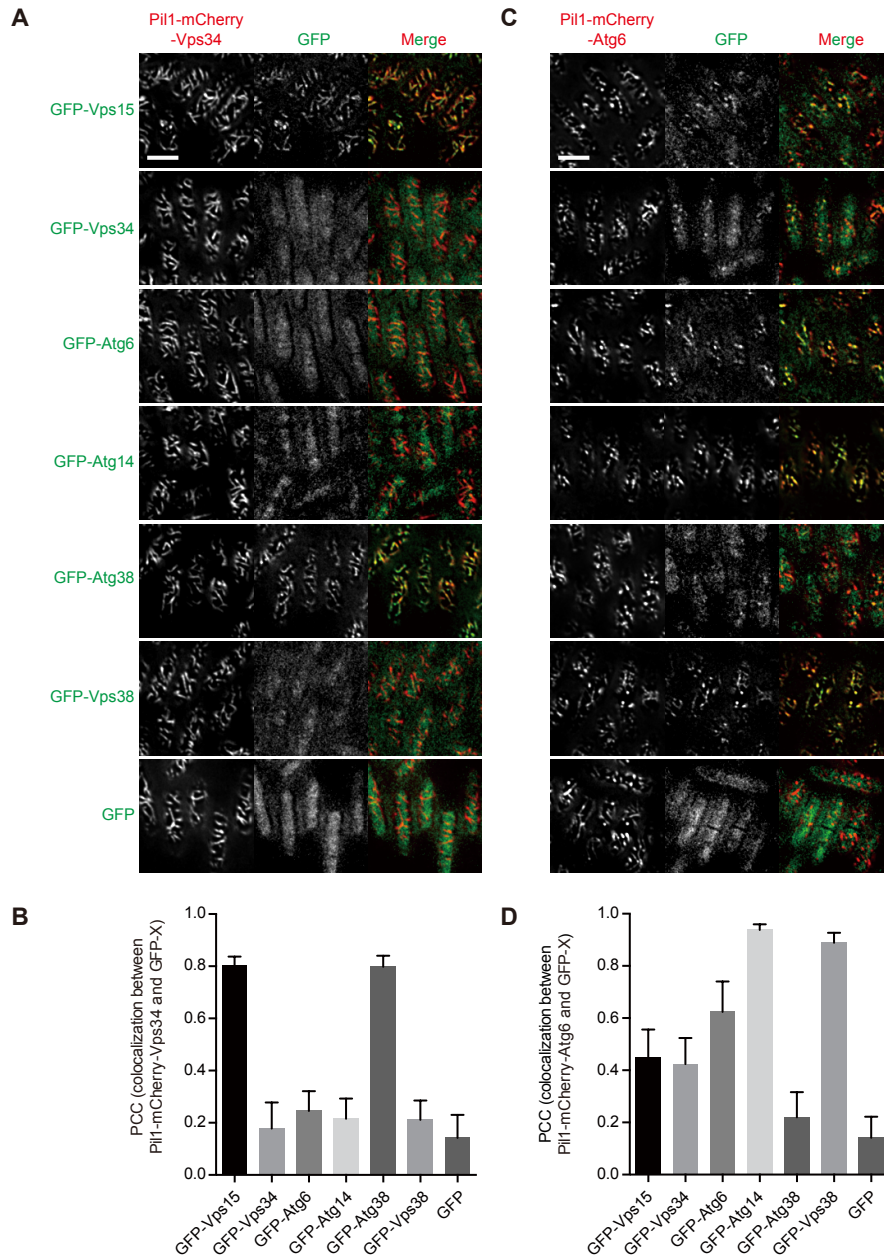

843

844 **Figure S4. Pil1 co-tethering assay using Vps34 and Atg6 as bait and subunits of PtdIns3K**

845 **complexes as prey.** (A) Experiments using Pil1-mCherry-Vps34 as bait. (B) Imaging data from

846 the experiments shown in (A) were analyzed and the PCC values are presented as mean ± s.d.

847 (10 cells). (C) Experiments using Pil1-mCherry-Atg6 as bait. (D) Imaging data from the

848 experiments shown in (C) were analyzed and the PCC values are presented as mean ± s.d. (10

849 cells). Scale bars, 5 μm.

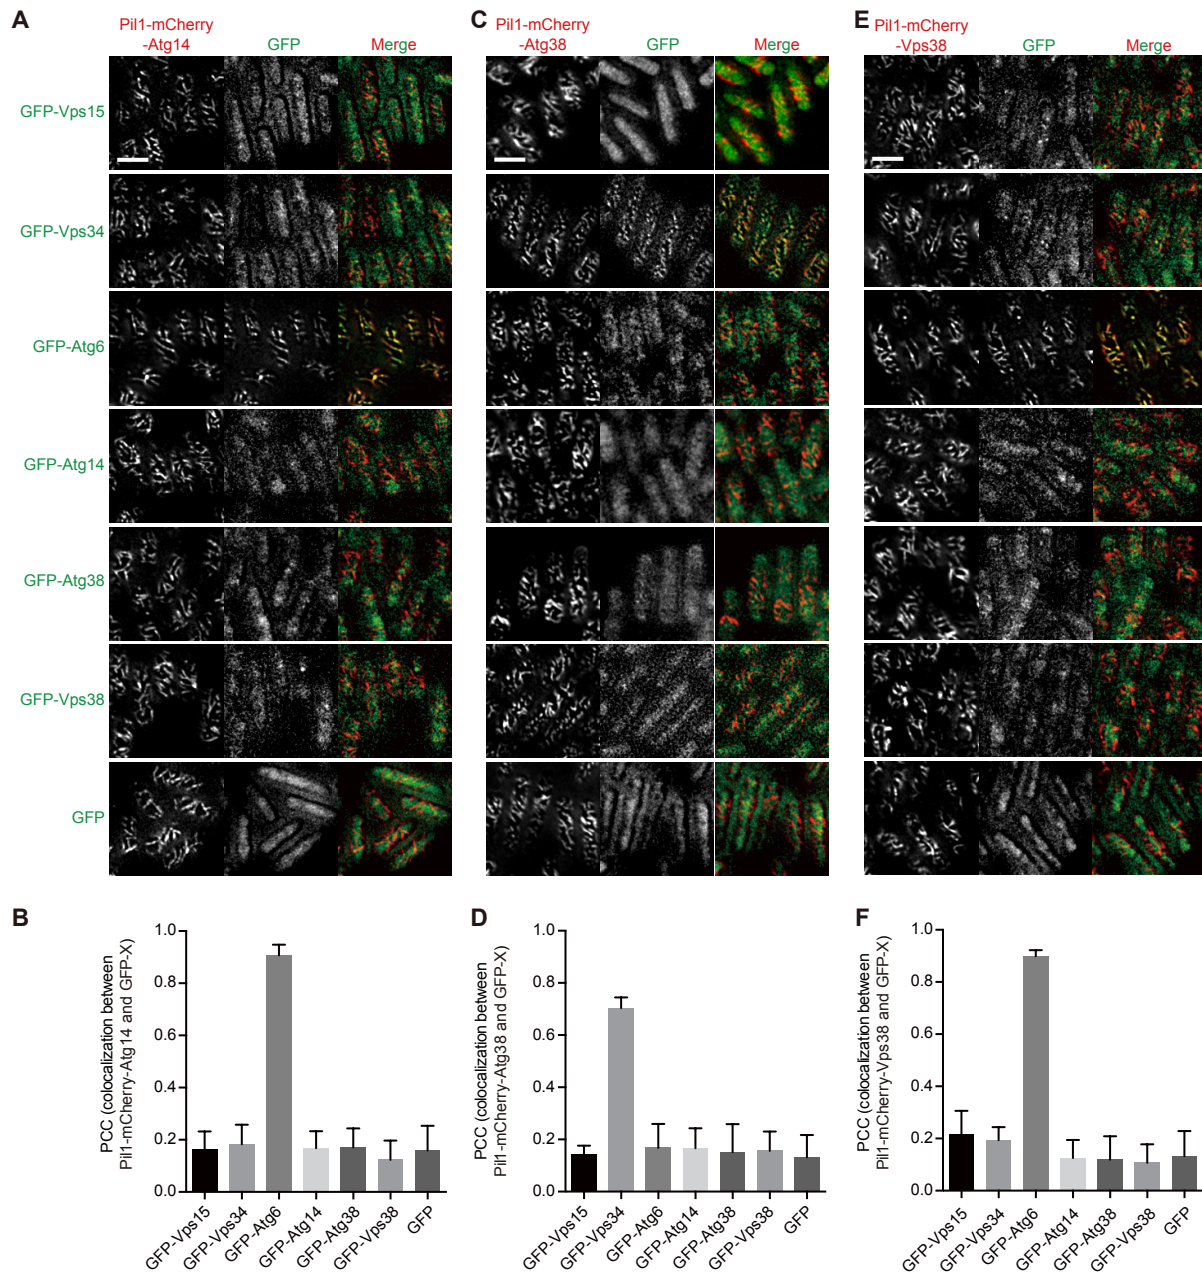

850

851 **Figure S5. Pil1 co-tethering assay using Atg14, Atg38, and Vps38 as bait and subunits of**

852 **PtdIns3K complexes as prey. (A) Experiments using Pil1-mCherry-Atg14 as bait. (B)**

853 **Imaging data from the experiments shown in (A) were analyzed and the PCC values are**

854 **presented as mean  $\pm$  s.d. (10 cells). (C) Experiments using Pil1-mCherry-Atg38 as bait. (D)**

855 **Imaging data from the experiments shown in (C) were analyzed and the PCC values are**

856 **presented as mean  $\pm$  s.d. (10 cells). (E) Experiments using Pil1-mCherry-Vps38 as bait. (F)**

857 Imaging data from the experiments shown in (E) were analyzed and the PCC values are  
858 presented as mean  $\pm$  s.d. (10 cells). Scale bar, 5  $\mu$ m.

859

860

861

862

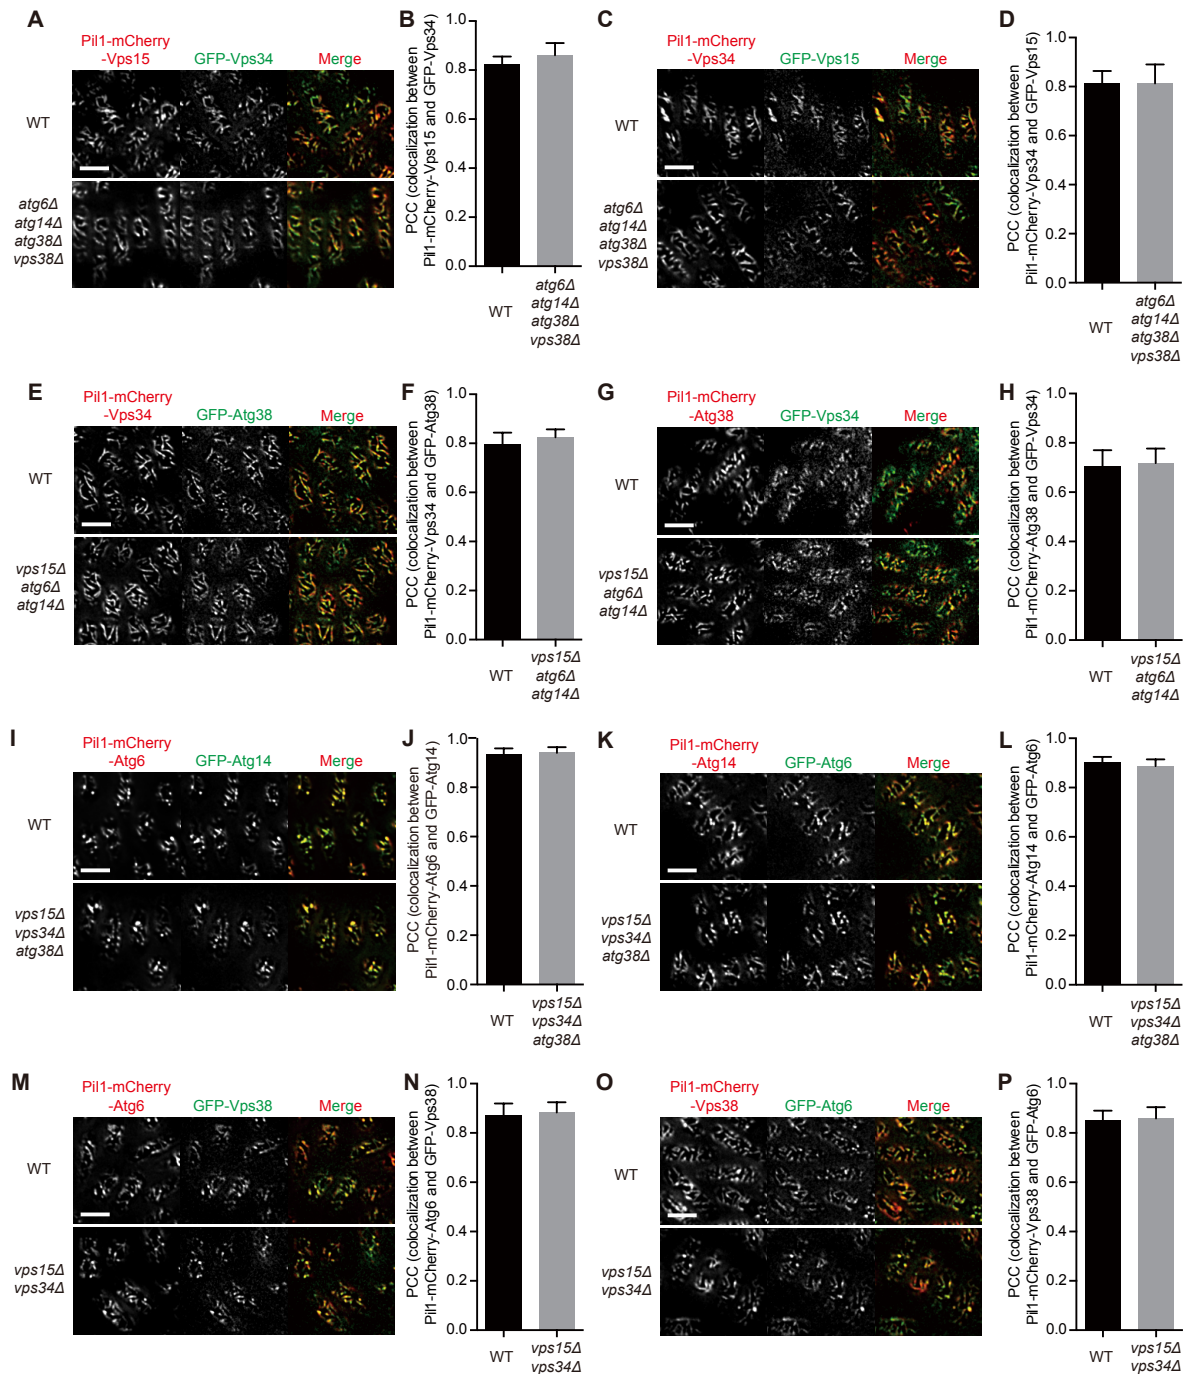

863

864 **Figure S6. Interactions between Vps15 and Vps34, between Vps34 and Atg38, between**  
 865 **Atg6 and Atg14, and between Atg6 and Vps38 are independent of the other subunits of**  
 866 **PtdIns3K complexes. (A) Deletion of *atg6*, *atg14*, *atg38*, and *vps38* did not influence the**  
 867 **interaction between Vps15 and Vps34 when using Vps15 as bait. (B) Imaging data from the**  
 868 **experiments shown in (A) were analyzed and the PCC values are presented as mean  $\pm$  s.d. (10**



869 cells). (C) Deletion of *atg6*, *atg14*, *atg38*, and *vps38* did not influence the interaction between  
870 Vps15 and Vps34 when using Vps34 as bait. (D) Imaging data from the experiments shown in  
871 (C) were analyzed and the PCC values are presented as mean  $\pm$  s.d. (10 cells). (E) Deletion of  
872 *vps15*, *atg6*, and *atg14* did not influence the interaction between Vps34 and Atg38 when using  
873 Vps34 as bait. (F) Imaging data from the experiments shown in (E) were analyzed and the PCC  
874 values are presented as mean  $\pm$  s.d. (10 cells). (G) Deletion of *vps15*, *atg6*, and *atg14* did not  
875 influence the interaction between Vps34 and Atg38 when using Atg38 as bait. (H) Imaging  
876 data from the experiments shown in (G) were analyzed and the PCC values are presented as  
877 mean  $\pm$  s.d. (10 cells). (I) Deletion of *vps15*, *vps34*, and *atg38* did not influence the interaction  
878 between Atg6 and Atg14 when using Atg6 as bait. (J) Imaging data from the experiments  
879 shown in (I) were analyzed and the PCC values are presented as mean  $\pm$  s.d. (10 cells). (K)  
880 Deletion of *vps15*, *vps34*, and *atg38* did not influence the interaction between Atg6 and Atg14  
881 when using Atg14 as bait. (L) Imaging data from the experiments shown in (K) were analyzed  
882 and the PCC values are presented as mean  $\pm$  s.d. (10 cells). (M) Deletion of *vps15* and *vps34*  
883 did not influence the interaction between Atg6 and Vps38 when using Atg6 as bait. (N)  
884 Imaging data from the experiments shown in (M) were analyzed and the PCC values are  
885 presented as mean  $\pm$  s.d. (10 cells). (O) Deletion of *vps15* and *vps34* did not influence the  
886 interaction between Atg6 and Vps38 when using Vps38 as bait. (P) Imaging data from the  
887 experiments shown in (O) were analyzed and the PCC values are presented as mean  $\pm$  s.d. (10  
888 cells). Scale bars, 5  $\mu$ m.

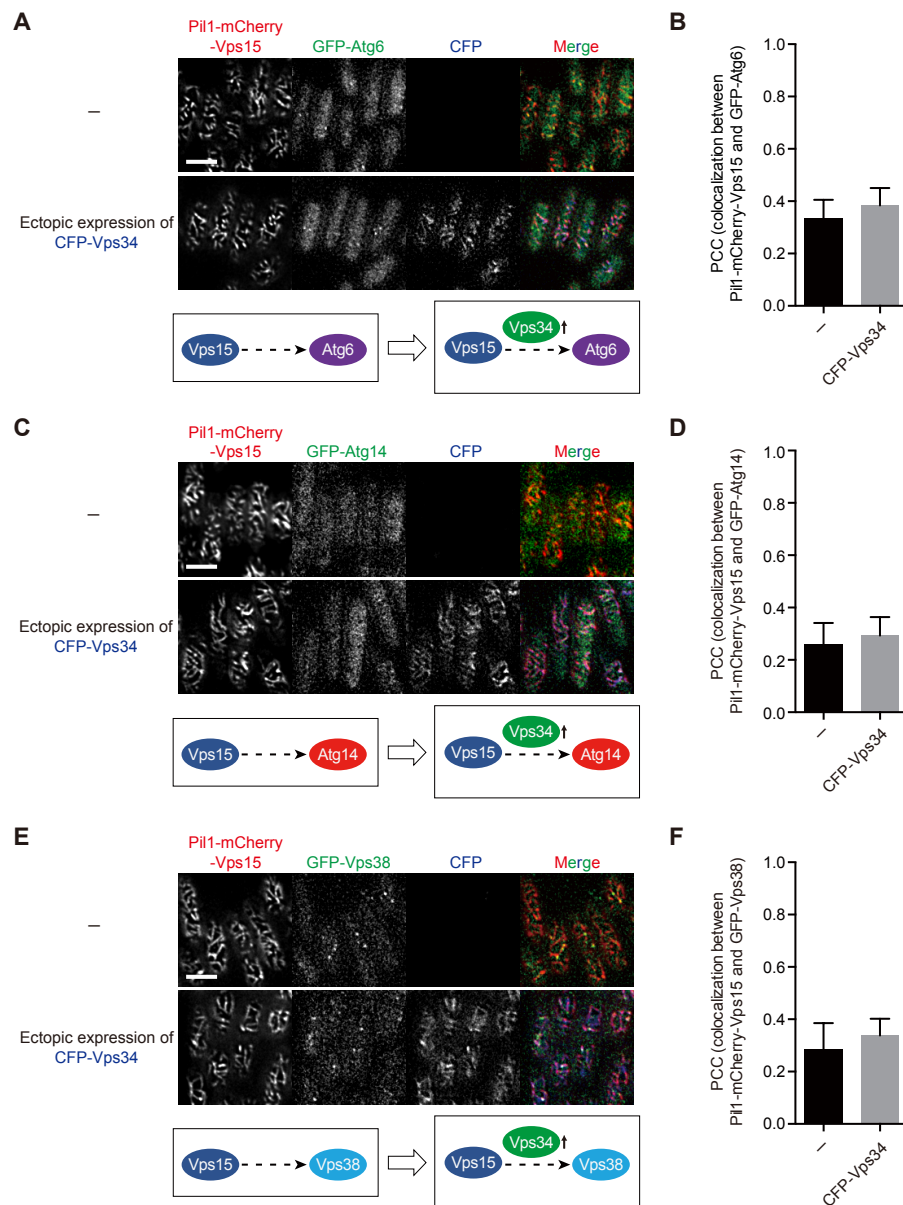

889

890 **Figure S7. Atg6, Atg14, and Vps38 individually does not interact with the Vps15-Vps34**

891 **subcomplex.** (A) Ectopic expression of Vps34 did not lead to the colocalization of Vps15 and

892 Atg6. (B) Imaging data from the experiments shown in (A) were analyzed and the PCC values

893 are presented as mean  $\pm$  s.d. (10 cells). (C) Ectopic expression of Vps34 did not lead to the

894 colocalization of Vps15 and Atg14. (D) Imaging data from the experiments shown in (C) were

895 analyzed and the PCC values are presented as mean  $\pm$  s.d. (10 cells). (E) Ectopic expression of

896 Vps34 did not lead to the colocalization of Vps15 and Vps38. (F) Imaging data from the

897 experiments shown in (E) were analyzed and the PCC values are presented as mean  $\pm$  s.d. (10

898 cells). Scale bars, 5  $\mu\text{m}$ .

899

900

901

902

903

904

905



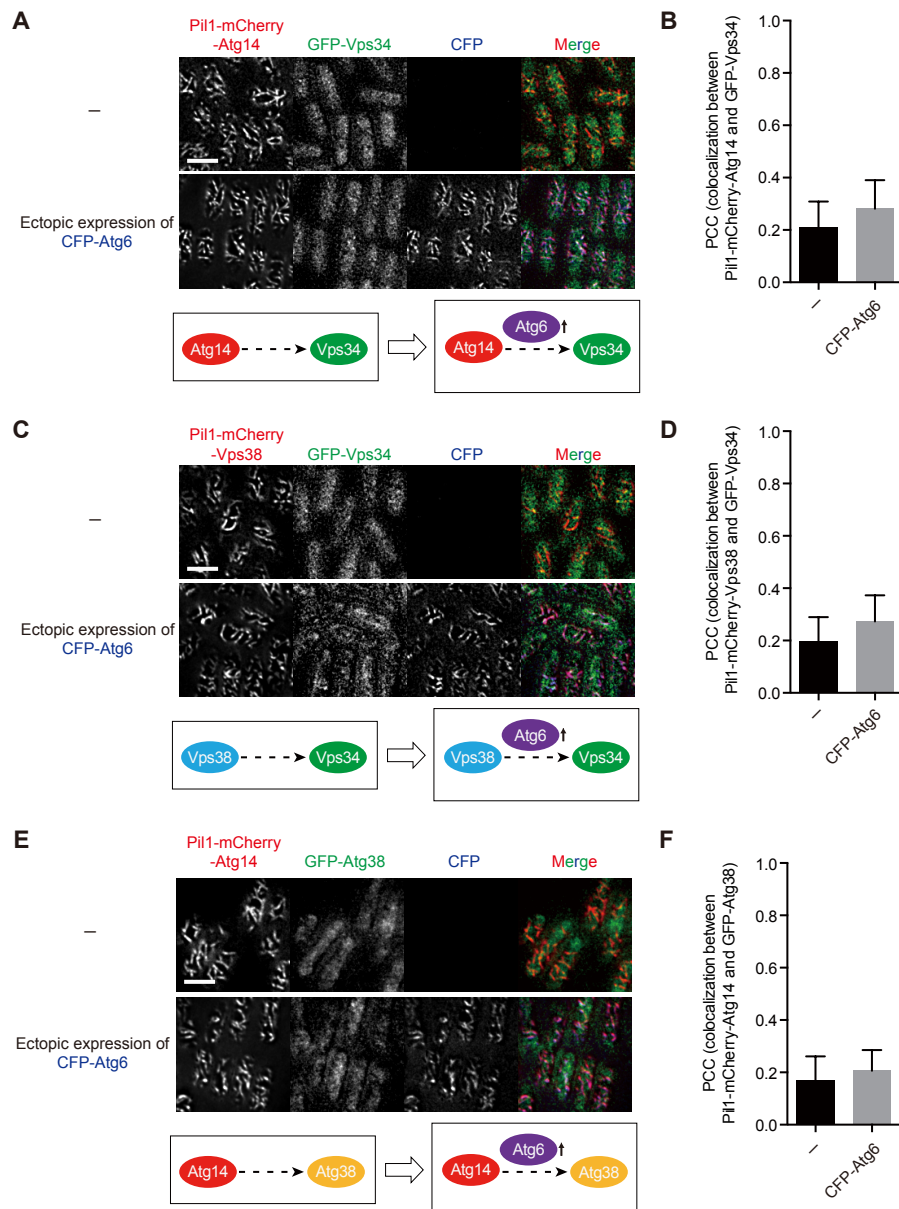

906

907 **Figure S8. The Atg14-Atg6 subcomplex and the Vps38-Atg6 subcomplex do not interact**

908 **with Vps34, and the Atg14-Atg6 subcomplex does not interact with Atg38.** (A) Ectopic

909 expression of Atg6 did not lead to the colocalization of Atg14 and Vps34. (B) Imaging data

910 from the experiments shown in (A) were analyzed and the PCC values are presented as mean

911  $\pm$  s.d. (10 cells). (C) Ectopic expression of Atg6 did not lead to the colocalization of Vps38 and

912 Vps34. (D) Imaging data from the experiments shown in (C) were analyzed and the PCC values

913 are presented as mean  $\pm$  s.d. (10 cells). (E) Ectopic expression of Atg6 did not lead to the

914 colocalization of Atg14 and Atg38. (F) Imaging data from the experiments shown in (E) were  
915 analyzed and the PCC values are presented as mean  $\pm$  s.d. (10 cells). Scale bars, 5  $\mu$ m.

916

917

918

919

920

921

922

923

924

925

926

927

928

929

930

931

932

933

934

935

936

937

938

939

940

941

942 **Table S1.** Fission yeast strains used in this study

| Strain  | Mating Type | Genotype                                                                                                                             | Use       |
|---------|-------------|--------------------------------------------------------------------------------------------------------------------------------------|-----------|
| DY39067 | h?          | <i>leu1-32::41nmt1p-GFP(leu1+) ars1::41nmt1p-pil1-mCherry(ura4+)</i>                                                                 | Fig. 1A   |
| DY37285 | h-          | <i>atg38Δ::kanMX leu1-32::41nmt1p-pil1-mCherry(leu1+) ars1::41nmt1p-GFP-atg8(ura4+)</i>                                              | Fig. 2B,C |
| DY37288 | h-          | <i>ura4-D18 atg38Δ::kanMX leu1-32::41nmt1p-pil1-mCherry-atg38(161-190)(leu1+) ars1::41nmt1p-GFP-atg8(ura4+)</i>                      | Fig. 2B,C |
| DY37660 | h-          | <i>ura4-D18 atg38Δ::kanMX leu1-32::41nmt1p-pil1-mCherry-atg38(161-190)<sup>F178A</sup>(leu1+) ars1::41nmt1p-GFP-atg8(ura4+)</i>      | Fig. 2B,C |
| DY37663 | h-          | <i>ura4-D18 atg38Δ::kanMX leu1-32::41nmt1p-pil1-mCherry-atg38(161-190)<sup>V181A</sup>(leu1+) ars1::41nmt1p-GFP-atg8(ura4+)</i>      | Fig. 2B,C |
| DY37666 | h-          | <i>ura4-D18 atg38Δ::kanMX leu1-32::41nmt1p-pil1-mCherry-atg38(161-190)<sup>F178AV181A</sup>(leu1+) ars1::41nmt1p-GFP-atg8(ura4+)</i> | Fig. 2B,C |
| DY38114 | h-          | <i>ura4-D18 atg38Δ::kanMX leu1-32::41nmt1p-pil1-mCherry-atg38(161-190)(leu1+) ars1::41nmt1p-GFP-atg8<sup>P52AR67A</sup>(ura4+)</i>   | Fig. 2B,C |
| DY31436 | h+          | <i>his3-D1 ura4-D18 leu1-32::41nmt1p-pil1-mCherry(leu1+) ars1::41nmt1p-hfl1(386-409)-GFP(ura4+)</i>                                  | Fig. 2E,F |
| DY31440 | h+          | <i>his3-D1 ura4-D18 leu1-32::41nmt1p-pil1-mCherry-atg8(1-115)(leu1+) ars1::41nmt1p-hfl1(386-409)-GFP(ura4+)</i>                      | Fig. 2E,F |
| DY32321 | h?          | <i>his3-D1 ura4-D18 leu1-32::41nmt1p-pil1-mCherry-atg8(1-115)(leu1+) ars1::41nmt1p-hfl1(386-409)<sup>Y398A</sup>-GFP(ura4+)</i>      | Fig. 2E,F |
| DY44684 | h+          | <i>his3-D1 ura4-D18 leu1-32::41nmt1p-pil1-mCherry(leu1+) ars1::nmt1p-atg9-YFH(ura4+)</i>                                             | Fig. 3B,C |
| DY47917 | h?          | <i>his3-D1 ura4-D18 leu1-32::41nmt1p-pil1-ctl1-mCherry(leu1+) ars1::nmt1p-atg9-YFH(ura4+)</i>                                        | Fig. 3B,C |
| DY39651 | h+          | <i>ura4-D18 leu1-32::41nmt1p-lig4-GFP (leu1+) ars1::41nmt1p-pil1-mCherry(ura4+)</i>                                                  | Fig. 3E,F |
| DY39653 | h+          | <i>ura4-D18 leu1-32::41nmt1p-lig4-GFP (leu1+) ars1::41nmt1p-pil1-mCherry-xrc4(ura4+)</i>                                             | Fig. 3E,F |
| DY39818 | h?          | <i>ura4-D18 leu1-32::41nmt1p-lig4(741-913)-GFP (leu1+) ars1::41nmt1p-pil1-mCherry(ura4+)</i>                                         | Fig. 3G,H |
| DY40113 | h?          | <i>ura4-D18 leu1-32::41nmt1p-lig4(741-913)-GFP (leu1+) ars1::41nmt1p-pil1-mCherry-xrc4(ura4+)</i>                                    | Fig. 3G,H |
| DY44709 | h-          | <i>ura4-D18 leu1-32::41nmt1p-GFP(leu1+) ars1::41nmt1p-pil1-mCherry-atg17(ura4+)</i>                                                  | Fig. 4B,C |
| DY44711 | h-          | <i>ura4-D18 leu1-32::41nmt1p-atg1-GFP(leu1+) ars1::41nmt1p-pil1-mCherry-atg17(ura4+)</i>                                             | Fig. 4B,C |
| DY44713 | h-          | <i>ura4-D18 leu1-32::41nmt1p-atg11-GFP(leu1+) ars1::41nmt1p-pil1-mCherry-atg17(ura4+)</i>                                            | Fig. 4B,C |

|         |    |                                                                                                                                                                                                                  |                  |
|---------|----|------------------------------------------------------------------------------------------------------------------------------------------------------------------------------------------------------------------|------------------|
| DY44715 | h- | <i>ura4-D18 leu1-32::41nmt1p-atg13-GFP(leu1+) ars1::41nmt1p-pill-mCherry-atg17(ura4+)</i>                                                                                                                        | Fig. 4B,C        |
| DY44717 | h- | <i>ura4-D18 leu1-32::41nmt1p-atg17-GFP(leu1+) ars1::41nmt1p-pill-mCherry-atg17(ura4+)</i>                                                                                                                        | Fig. 4B,C        |
| DY44719 | h- | <i>ura4-D18 leu1-32::41nmt1p-atg101-GFP(leu1+) ars1::41nmt1p-pill-mCherry-atg17(ura4+)</i>                                                                                                                       | Fig. 4B,C        |
| DY31679 | h- | <i>ura4-D18 41nmt1p-CFP-vps34::hphMX leu1-32::nmt41-Pill-mcherry(Leu1+)</i>                                                                                                                                      | Fig. 5E,F        |
| DY31681 | h- | <i>ura4-D18 41nmt1p-CFP-vps34::hphMX leu1-32::41nmt1p-pill-mCherry-atg38(Leu1+)</i>                                                                                                                              | Fig. 5E,F        |
| DY31685 | h- | <i>ura4-D18 41nmt1p-CFP-vps34::hphMX leu1-32::41nmt1p-pill-mCherry-atg38(<math>\Delta</math>153-160)(Leu1+)</i>                                                                                                  | Fig. 5E,F        |
| DY31689 | h- | <i>ura4-D18 41nmt1p-CFP-vps34::hphMX leu1-32::41nmt1p-pill-mCherry-atg38<sup>F157A</sup>(Leu1+)</i>                                                                                                              | Fig. 5E,F        |
| DY30042 | h? | <i>ura4-D18 atg38<math>\Delta</math>::kanMX pho8<math>\Delta</math>::kanMX leu1-32::41nmt1p-pho8<math>\Delta</math>60(<i>S.cerevesiae</i>)-GFP(leu1+) ars1::pDUAL-vector(ura4+)</i>                              | Fig. 5G          |
| DY31619 | h? | <i>ura4-D18 atg38<math>\Delta</math>::kanMX pho8<math>\Delta</math>::kanMX leu1-32::41nmt1p-pho8<math>\Delta</math>60(<i>S.cerevesiae</i>)-GFP(leu1+) ars1::nmt1p-atg38-mCherry(ura4+)</i>                       | Fig. 5G          |
| DY31651 | h? | <i>ura4-D18 atg38<math>\Delta</math>::kanMX pho8<math>\Delta</math>::kanMX leu1-32::41nmt1p-pho8<math>\Delta</math>60(<i>S.cerevesiae</i>)-GFP(leu1+) ars1::nmt1p-atg38<sup>F157A</sup>-mCherry(ura4+)</i>       | Fig. 5G          |
| DY31623 | h? | <i>ura4-D18 atg38<math>\Delta</math>::kanMX pho8<math>\Delta</math>::kanMX leu1-32::41nmt1p-pho8<math>\Delta</math>60(<i>S.cerevesiae</i>)-GFP(leu1+) ars1::nmt1p-atg38-mCherry-vps34(ura4+)</i>                 | Fig. 5G          |
| DY31653 | h? | <i>ura4-D18 atg38<math>\Delta</math>::kanMX pho8<math>\Delta</math>::kanMX leu1-32::41nmt1p-pho8<math>\Delta</math>60(<i>S.cerevesiae</i>)-GFP(leu1+) ars1::nmt1p-atg38<sup>F157A</sup>-mCherry-vps34(ura4+)</i> | Fig. 5G          |
| DY36366 | h+ | <i>ura4-D18 leu1-32::41nmt1p-GFP-atg38(leu1+) ars1::41nmt1p-pill-mcherry-vps15(ura4+)</i>                                                                                                                        | Fig. 6A,B, S5C,D |
| DY43605 | h? | <i>ura4-D18 41nmt1p-CFP-vps34::hphMX leu1-32::41nmt1p-GFP-atg38(leu1+) ars1::41nmt1p-pill-mcherry-vps15(ura4+)</i>                                                                                               | Fig. 6A,B        |
| DY32233 | h- | <i>ura4-D18 leu1-32::41nmt1p-pill-mCherry-atg38(leu1+) ars1::41nmt1p-GFP-vps15(ura4+)</i>                                                                                                                        | Fig. 6C,D        |
| DY33372 | h- | <i>ura4-D18 41nmt1p-CFP-vps34::hphMX leu1-32::41nmt1p-pill-mCherry-atg38(leu1+) ars1::41nmt1p-GFP-vps15(ura4+)</i>                                                                                               | Fig. 6C,D        |
| DY33590 | h- | <i>ura4-D18 leu1-32::41nmt1p-GFP-vps15(leu1+) ars1::41nmt1p-pill-mcherry-vps34(1-250)(ura4+)</i>                                                                                                                 | Fig. 6E,F        |
| DY33593 | h- | <i>ura4-D18 leu1-32::41nmt1p-GFP-vps15(leu1+) ars1::41nmt1p-pill-mcherry-vps34(251-801)(ura4+)</i>                                                                                                               | Fig. 6E,F        |
| DY33585 | h- | <i>ura4-D18 leu1-32::41nmt1p-GFP-atg38(leu1+) ars1::41nmt1p-pill-mcherry-vps34(1-250)(ura4+)</i>                                                                                                                 | Fig. 6G,H        |

|         |    |                                                                                                                                                          |                  |
|---------|----|----------------------------------------------------------------------------------------------------------------------------------------------------------|------------------|
| DY33587 | h- | <i>ura4-D18 leu1-32::41nmt1p-GFP-atg38(leu1+) ars1::41nmt1p-pil1-mcherry-vps34(251-801)(ura4+)</i>                                                       | Fig. 6G,H        |
| DY36282 | h+ | <i>ura4-D18 leu1-32::41nmt1p-GFP-vps15(leu1+) ars1::41nmt1p-pil1-mcherry-atg14(ura4+)</i>                                                                | Fig. 7A,B, S5A,B |
| DY36694 | h+ | <i>ura4-D18 his3::41nmt1p-CFP-atg6(his3- hphMX) leu1-32::41nmt1p-GFP-vps15(leu1+) ars1::41nmt1p-pil1-mcherry-atg14(ura4+)</i>                            | Fig. 7A,B        |
| DY36996 | h? | <i>vps34A::kanMX ura4-D18 his3::41nmt1p-CFP-atg6(his3- hphMX) leu1-32::41nmt1p-GFP-vps15(leu1+) ars1::41nmt1p-pil1-mcherry-atg14(ura4+)</i>              | Fig. 7A,B        |
| DY36534 | h+ | <i>ura4-D18 leu1-32::41nmt1p-GFP-vps15(leu1+) ars1::41nmt1p-pil1-mcherry-vps38(ura4+)</i>                                                                | Fig. 7C,D, S5E,F |
| DY36697 | h+ | <i>ura4-D18 his3::41nmt1p-CFP-atg6(his3- hphMX) leu1-32::41nmt1p-GFP-vps15(leu1+) ars1::41nmt1p-pil1-mcherry-vps38(ura4+)</i>                            | Fig. 7C,D        |
| DY36999 | h? | <i>vps34A::kanMX ura4-D18 his3::41nmt1p-CFP-atg6(his3- hphMX) leu1-32::41nmt1p-GFP-vps15(leu1+) ars1::41nmt1p-pil1-mcherry-vps38(ura4+)</i>              | Fig. 7C,D        |
| DY36352 | h+ | <i>ura4-D18 leu1-32::41nmt1p-GFP-vps15(leu1+) ars1::41nmt1p-pil1-mcherry-atg6(ura4+)</i>                                                                 | Fig. 7E,F, S4C,D |
| DY36779 | h+ | <i>ura4-D18 his3::41nmt1p-CFP-atg14(his3- hphMX) leu1-32::41nmt1p-GFP-vps15(leu1+) ars1::41nmt1p-pil1-mcherry-atg6(ura4+)</i>                            | Fig. 7E,F        |
| DY36782 | h+ | <i>ura4-D18 his3::41nmt1p-CFP-vps38(his3- hphMX) leu1-32::41nmt1p-GFP-vps15(leu1+) ars1::41nmt1p-pil1-mcherry-atg6(ura4+)</i>                            | Fig. 7E,F        |
| DY36711 | h- | <i>ura4-D18 his3::41nmt1p-CFP-atg6(his3- hphMX) leu1-32::41nmt1p-GFP-atg14(leu1+) ars1::41nmt1p-pil1-mcherry-vps34(ura4+)</i>                            | Fig. 8A,B        |
| DY37873 | h? | <i>ura4-D18 41nmt1p-13Myc-vps15::hphMX his3::41nmt1p-CFP-atg6(his3- hphMX) leu1-32::41nmt1p-GFP-atg14(leu1+) ars1::41nmt1p-pil1-mcherry-vps34(ura4+)</i> | Fig. 8A,B        |
| DY36714 | h- | <i>ura4-D18 his3::41nmt1p-CFP-atg6(his3- hphMX) leu1-32::41nmt1p-GFP-vps38(leu1+) ars1::41nmt1p-pil1-mcherry-vps34(ura4+)</i>                            | Fig. 8C,D        |
| DY37877 | h? | <i>ura4-D18 41nmt1p-13Myc-vps15::hphMX his3::41nmt1p-CFP-atg6(his3- hphMX) leu1-32::41nmt1p-GFP-vps38(leu1+) ars1::41nmt1p-pil1-mcherry-vps34(ura4+)</i> | Fig. 8C,D        |
| DY44733 | h- | <i>ura4-D18 leu1-32::41nmt1p-GFP(leu1+) ars1::41nmt1p-pil1-mCherry(ura4+)</i>                                                                            | Fig. S1A,B       |
| DY44735 | h- | <i>ura4-D18 leu1-32::41nmt1p-atg1-GFP(leu1+) ars1::41nmt1p-pil1-mCherry(ura4+)</i>                                                                       | Fig. S1A,B       |
| DY44737 | h- | <i>ura4-D18 leu1-32::41nmt1p-atg11-GFP(leu1+) ars1::41nmt1p-pil1-mCherry(ura4+)</i>                                                                      | Fig. S1A,B       |
| DY44739 | h- | <i>ura4-D18 leu1-32::41nmt1p-atg13-GFP(leu1+) ars1::41nmt1p-pil1-mCherry(ura4+)</i>                                                                      | Fig. S1A,B       |

|         |    |                                                                                            |                |
|---------|----|--------------------------------------------------------------------------------------------|----------------|
| DY44741 | h- | <i>ura4-D18 leu1-32::41nmt1p-atg17-GFP(leu1+) ars1::41nmt1p-pill-mCherry(ura4+)</i>        | Fig. S1A,B     |
| DY44743 | h- | <i>ura4-D18 leu1-32::41nmt1p-atg101-GFP(leu1+) ars1::41nmt1p-pill-mCherry(ura4+)</i>       | Fig. S1A,B     |
| DY44767 | h- | <i>ura4-D18 leu1-32::41nmt1p-GFP(leu1+) ars1::41nmt1p-pill-mCherry-atg1(ura4+)</i>         | Fig. S1C,D     |
| DY44769 | h- | <i>ura4-D18 leu1-32::41nmt1p-atg1-GFP(leu1+) ars1::41nmt1p-pill-mCherry-atg1(ura4+)</i>    | Fig. S1C,D     |
| DY44770 | h- | <i>ura4-D18 leu1-32::41nmt1p-atg11-GFP(leu1+) ars1::41nmt1p-pill-mCherry-atg1(ura4+)</i>   | Fig. S1C,D     |
| DY44771 | h- | <i>ura4-D18 leu1-32::41nmt1p-atg13-GFP(leu1+) ars1::41nmt1p-pill-mCherry-atg1(ura4+)</i>   | Fig. S1C,D     |
| DY44773 | h- | <i>ura4-D18 leu1-32::41nmt1p-atg17-GFP(leu1+) ars1::41nmt1p-pill-mCherry-atg1(ura4+)</i>   | Fig. S1C,D     |
| DY44775 | h- | <i>ura4-D18 leu1-32::41nmt1p-atg101-GFP(leu1+) ars1::41nmt1p-pill-mCherry-atg1(ura4+)</i>  | Fig. S1C,D     |
| DY44756 | h- | <i>ura4-D18 leu1-32::41nmt1p-GFP(leu1+) ars1::41nmt1p-pill-mCherry-atg11(ura4+)</i>        | Fig. S1E,F     |
| DY44758 | h- | <i>ura4-D18 leu1-32::41nmt1p-atg1-GFP(leu1+) ars1::41nmt1p-pill-mCherry-atg11(ura4+)</i>   | Fig. S1E,F     |
| DY44759 | h- | <i>ura4-D18 leu1-32::41nmt1p-atg11-GFP(leu1+) ars1::41nmt1p-pill-mCherry-atg11(ura4+)</i>  | Fig. S1E,F     |
| DY44760 | h- | <i>ura4-D18 leu1-32::41nmt1p-atg13-GFP(leu1+) ars1::41nmt1p-pill-mCherry-atg11(ura4+)</i>  | Fig. S1E,F     |
| DY44762 | h- | <i>ura4-D18 leu1-32::41nmt1p-atg17-GFP(leu1+) ars1::41nmt1p-pill-mCherry-atg11(ura4+)</i>  | Fig. S1E,F     |
| DY44764 | h- | <i>ura4-D18 leu1-32::41nmt1p-atg101-GFP(leu1+) ars1::41nmt1p-pill-mCherry-atg11(ura4+)</i> | Fig. S1E,F     |
| DY44721 | h- | <i>ura4-D18 leu1-32::41nmt1p-GFP(leu1+) ars1::41nmt1p-pill-mCherry-atg13(ura4+)</i>        | Fig. S2A,B     |
| DY44723 | h- | <i>ura4-D18 leu1-32::41nmt1p-atg1-GFP(leu1+) ars1::41nmt1p-pill-mCherry-atg13(ura4+)</i>   | Fig. S2A,B     |
| DY44725 | h- | <i>ura4-D18 leu1-32::41nmt1p-atg11-GFP(leu1+) ars1::41nmt1p-pill-mCherry-atg13(ura4+)</i>  | Fig. S2A,B,G,H |
| DY44727 | h- | <i>ura4-D18 leu1-32::41nmt1p-atg13-GFP(leu1+) ars1::41nmt1p-pill-mCherry-atg13(ura4+)</i>  | Fig. S2A,B     |
| DY44729 | h- | <i>ura4-D18 leu1-32::41nmt1p-atg17-GFP(leu1+) ars1::41nmt1p-pill-mCherry-atg13(ura4+)</i>  | Fig. S2A,B     |
| DY44731 | h- | <i>ura4-D18 leu1-32::41nmt1p-atg101-GFP(leu1+) ars1::41nmt1p-pill-mCherry-atg13(ura4+)</i> | Fig. S2A,B     |
| DY44697 | h- | <i>ura4-D18 leu1-32::41nmt1p-GFP(leu1+) ars1::41nmt1p-pill-mCherry-atg101(ura4+)</i>       | Fig. S2C,D     |



|          |    |                                                                                                        |                   |
|----------|----|--------------------------------------------------------------------------------------------------------|-------------------|
| DY44699  | h- | <i>ura4-D18 leu1-32::41nmt1p-atg1-GFP(leu1+) ars1::41nmt1p-pil1-mCherry-atg101(ura4+)</i>              | Fig. S2C,D        |
| DY44701  | h- | <i>ura4-D18 leu1-32::41nmt1p-atg11-GFP(leu1+) ars1::41nmt1p-pil1-mCherry-atg101(ura4+)</i>             | Fig. S2C,D        |
| DY44703  | h- | <i>ura4-D18 leu1-32::41nmt1p-atg13-GFP(leu1+) ars1::41nmt1p-pil1-mCherry-atg101(ura4+)</i>             | Fig. S2C,D        |
| DY44705  | h- | <i>ura4-D18 leu1-32::41nmt1p-atg17-GFP(leu1+) ars1::41nmt1p-pil1-mCherry-atg101(ura4+)</i>             | Fig. S2C,D        |
| DY44707  | h- | <i>ura4-D18 leu1-32::41nmt1p-atg101-GFP(leu1+) ars1::41nmt1p-pil1-mCherry-atg101(ura4+)</i>            | Fig. S2C,D        |
| DY44761  | h- | <i>ura4-D18 leu1-32::41nmt1p-atg13-GFP(leu1+) ars1::41nmt1p-pil1-mCherry-atg11(ura4+)</i>              | Fig. S2E,F        |
| DY46360  | h? | <i>atg1A::natMX ura4-D18 leu1-32::41nmt1p-atg13-GFP(leu1+) ars1::41nmt1p-pil1-mCherry-atg11(ura4+)</i> | Fig. S2E,F        |
| DY463658 | h? | <i>atg1A::natMX ura4-D18 leu1-32::41nmt1p-atg11-GFP(leu1+) ars1::41nmt1p-pil1-mCherry-atg13(ura4+)</i> | Fig. S2G,H        |
| DY32961  | h- | <i>ura4-D18 leu1-32::41nmt1p-GFP-vps15(leu1+) ars1::41nmt1p-pil1-mCherry(ura4+)</i>                    | Fig. S3A,B        |
| DY38750  | h+ | <i>ura4-D18 leu1-32::41nmt1p-GFP-vps34(leu1+) ars1::41nmt1p-pil1-mCherry(ura4+)</i>                    | Fig. S3A,B        |
| DY33173  | h- | <i>ura4-D18 leu1-32::41nmt1p-GFP-atg6(leu1+) ars1::41nmt1p-pil1-mCherry(ura4+)</i>                     | Fig. S3A,B        |
| DY32957  | h- | <i>ura4-D18 leu1-32::41nmt1p-GFP-atg14(leu1+) ars1::41nmt1p-pil1-mCherry(ura4+)</i>                    | Fig. S3A,B        |
| DY32959  | h- | <i>ura4-D18 leu1-32::41nmt1p-GFP-atg38(leu1+) ars1::41nmt1p-pil1-mCherry(ura4+)</i>                    | Fig. S3A,B        |
| DY32963  | h- | <i>ura4-D18 leu1-32::41nmt1p-GFP-vps38(leu1+) ars1::41nmt1p-pil1-mCherry(ura4+)</i>                    | Fig. S3A,B        |
| DY39067  | h? | <i>ura4-D18 leu1-32::41nmt1p-GFP(leu1+) ars1::41nmt1p-pil1-mCherry(ura4+)</i>                          | Fig. S3A,B        |
| DY36368  | h+ | <i>ura4-D18 leu1-32::41nmt1p-GFP-vps15(leu1+) ars1::41nmt1p-pil1-mCherry-vps15(ura4+)</i>              | Fig. S3C,D        |
| DY36370  | h+ | <i>ura4-D18 leu1-32::41nmt1p-GFP-vps34(leu1+) ars1::41nmt1p-pil1-mCherry-vps15(ura4+)</i>              | Fig. S3C,D, S6A,B |
| DY36360  | h+ | <i>ura4-D18 leu1-32::41nmt1p-GFP-atg6(leu1+) ars1::41nmt1p-pil1-mCherry-vps15(ura4+)</i>               | Fig. S3C,D        |
| DY36362  | h+ | <i>ura4-D18 leu1-32::41nmt1p-GFP-atg14(leu1+) ars1::41nmt1p-pil1-mCherry-vps15(ura4+)</i>              | Fig. S3C,D        |
| DY36373  | h+ | <i>ura4-D18 leu1-32::41nmt1p-GFP-vps38(leu1+) ars1::41nmt1p-pil1-mCherry-vps15(ura4+)</i>              | Fig. S3C,D        |
| DY39070  | h? | <i>ura4-D18 leu1-32::41nmt1p-GFP(leu1+) ars1::41nmt1p-pil1-mCherry-vps15(ura4+)</i>                    | Fig. S3C,D        |



|         |    |                                                                                           |                   |
|---------|----|-------------------------------------------------------------------------------------------|-------------------|
| DY33191 | h- | <i>ura4-D18 leu1-32::41nmt1p-GFP-vps15(leu1+) ars1::41nmt1p-pil1-mCherry-vps34(ura4+)</i> | Fig. S4A,B, S6C,D |
| DY37293 | h+ | <i>ura4-D18 leu1-32::41nmt1p-GFP-vps34(ura4+) ars1::41nmt1p-pil1-mCherry-vps34(ura4+)</i> | Fig. S4A,B        |
| DY33370 | h- | <i>ura4-D18 leu1-32::41nmt1p-GFP-atg6(ura4+) ars1::41nmt1p-pil1-mCherry-vps34(ura4+)</i>  | Fig. S4A,B        |
| DY33186 | h- | <i>ura4-D18 leu1-32::41nmt1p-GFP-atg14(ura4+) ars1::41nmt1p-pil1-mCherry-vps34(ura4+)</i> | Fig. S4A,B        |
| DY33189 | h- | <i>ura4-D18 leu1-32::41nmt1p-GFP-atg38(ura4+) ars1::41nmt1p-pil1-mCherry-vps34(ura4+)</i> | Fig. S4A,B, 10A,B |
| DY33193 | h- | <i>ura4-D18 leu1-32::41nmt1p-GFP-vps38(ura4+) ars1::41nmt1p-pil1-mCherry-vps34(ura4+)</i> | Fig. S4A,B        |
| DY39073 | h? | <i>ura4-D18 leu1-32::41nmt1p-GFP(ura4+) ars1::41nmt1p-pil1-mCherry-vps34(ura4+)</i>       | Fig. S4A,B        |
| DY36354 | h+ | <i>ura4-D18 leu1-32::41nmt1p-GFP-vps34(ura4+) ars1::41nmt1p-pil1-mCherry-atg6(ura4+)</i>  | Fig. S4C,D        |
| DY36342 | h+ | <i>ura4-D18 leu1-32::41nmt1p-GFP-atg6(ura4+) ars1::41nmt1p-pil1-mCherry-atg6(ura4+)</i>   | Fig. S4C,D        |
| DY36344 | h+ | <i>ura4-D18 leu1-32::41nmt1p-GFP-atg14(ura4+) ars1::41nmt1p-pil1-mCherry-atg6(ura4+)</i>  | Fig. S4C,D, S6I,J |
| DY36350 | h+ | <i>ura4-D18 leu1-32::41nmt1p-GFP-atg38(ura4+) ars1::41nmt1p-pil1-mCherry-atg6(ura4+)</i>  | Fig. S4C,D        |
| DY36357 | h+ | <i>ura4-D18 leu1-32::41nmt1p-GFP-vps38(ura4+) ars1::41nmt1p-pil1-mCherry-atg6(ura4+)</i>  | Fig. S4C,D, S6M,N |
| DY36653 | h+ | <i>ura4-D18 leu1-32::41nmt1p-GFP(ura4+) ars1::41nmt1p-pil1-mCherry-atg6(ura4+)</i>        | Fig. S4C,D        |
| DY36285 | h+ | <i>ura4-D18 leu1-32::41nmt1p-GFP-vps34(ura4+) ars1::41nmt1p-pil1-mCherry-atg14(ura4+)</i> | Fig. S5A,B        |
| DY36273 | h+ | <i>ura4-D18 leu1-32::41nmt1p-GFP-atg6(ura4+) ars1::41nmt1p-pil1-mCherry-atg14(ura4+)</i>  | Fig. S5A,B, S6K,L |
| DY36276 | h+ | <i>ura4-D18 leu1-32::41nmt1p-GFP-atg14(ura4+) ars1::41nmt1p-pil1-mCherry-atg14(ura4+)</i> | Fig. S5A,B        |
| DY36280 | h+ | <i>ura4-D18 leu1-32::41nmt1p-GFP-atg38(ura4+) ars1::41nmt1p-pil1-mCherry-atg14(ura4+)</i> | Fig. S5A,B, S8E,F |
| DY36287 | h+ | <i>ura4-D18 leu1-32::41nmt1p-GFP-vps38(ura4+) ars1::41nmt1p-pil1-mCherry-atg14(ura4+)</i> | Fig. S5A,B        |
| DY39076 | h? | <i>ura4-D18 leu1-32::41nmt1p-GFP(ura4+) ars1::41nmt1p-pil1-mCherry-atg14(ura4+)</i>       | Fig. S5A,B        |
| DY38186 | h+ | <i>ura4-D18 leu1-32::41nmt1p-GFP-vps15(ura4+) ars1::41nmt1p-pil1-mCherry-atg38(ura4+)</i> | Fig. S5C,D        |
| DY38190 | h+ | <i>ura4-D18 leu1-32::41nmt1p-GFP-vps34(ura4+) ars1::41nmt1p-pil1-mCherry-atg38(ura4+)</i> | Fig. S5C,D, S6G,H |

|         |    |                                                                                                                                                  |                   |
|---------|----|--------------------------------------------------------------------------------------------------------------------------------------------------|-------------------|
| DY38180 | h+ | <i>ura4-D18 leu1-32::41nmt1p-GFP-atg6(leu1+) ars1::41nmt1p-pil1-mCherry-atg38(ura4+)</i>                                                         | Fig. S5C,D        |
| DY38182 | h+ | <i>ura4-D18 leu1-32::41nmt1p-GFP-atg14(leu1+) ars1::41nmt1p-pil1-mCherry-atg38(ura4+)</i>                                                        | Fig. S5C,D        |
| DY38184 | h+ | <i>ura4-D18 leu1-32::41nmt1p-GFP-atg38(leu1+) ars1::41nmt1p-pil1-mCherry-atg38(ura4+)</i>                                                        | Fig. S5C,D        |
| DY38188 | h+ | <i>ura4-D18 leu1-32::41nmt1p-GFP-vps38(leu1+) ars1::41nmt1p-pil1-mCherry-atg38(ura4+)</i>                                                        | Fig. S5C,D        |
| DY39079 | h? | <i>ura4-D18 leu1-32::41nmt1p-GFP(leu1+) ars1::41nmt1p-pil1-mCherry-atg38(ura4+)</i>                                                              | Fig. S5C,D        |
| DY36535 | h+ | <i>ura4-D18 leu1-32::41nmt1p-GFP-vps15(leu1+) ars1::41nmt1p-pil1-mCherry-vps38(ura4+)</i>                                                        | Fig. S5E,F        |
| DY36536 | h+ | <i>ura4-D18 leu1-32::41nmt1p-GFP-vps34(leu1+) ars1::41nmt1p-pil1-mCherry-vps38(ura4+)</i>                                                        | Fig. S5E,F, S8C,D |
| DY36524 | h+ | <i>ura4-D18 leu1-32::41nmt1p-GFP-atg6(leu1+) ars1::41nmt1p-pil1-mCherry-vps38(ura4+)</i>                                                         | Fig. S5E,F, S6O,P |
| DY36527 | h+ | <i>ura4-D18 leu1-32::41nmt1p-GFP-atg14(leu1+) ars1::41nmt1p-pil1-mCherry-vps38(ura4+)</i>                                                        | Fig. S5E,F        |
| DY36532 | h+ | <i>ura4-D18 leu1-32::41nmt1p-GFP-atg38(leu1+) ars1::41nmt1p-pil1-mCherry-vps38(ura4+)</i>                                                        | Fig. S5E,F        |
| DY36539 | h+ | <i>ura4-D18 leu1-32::41nmt1p-GFP-vps38(leu1+) ars1::41nmt1p-pil1-mCherry-vps38(ura4+)</i>                                                        | Fig. S5E,F        |
| DY39082 | h? | <i>ura4-D18 leu1-32::41nmt1p-GFP(leu1+) ars1::41nmt1p-pil1-mCherry-vps38(ura4+)</i>                                                              | Fig. S5E,F        |
| DY37751 | h? | <i>atg6Δ::kanMX atg14Δ::kanMX atg38Δ::kanMX vps38Δ::natMX ura4-D18 leu1-32::41nmt1p-GFP-vps34(leu1+) ars1::41nmt1p-pil1-mCherry-vps15(ura4+)</i> | Fig. S6A,B        |
| DY37753 | h? | <i>atg6Δ::kanMX atg14Δ::kanMX atg38Δ::kanMX vps38Δ::natMX ura4-D18 leu1-32::41nmt1p-GFP-vps15(leu1+) ars1::41nmt1p-pil1-mCherry-vps34(ura4+)</i> | Fig. S6C,D        |
| DY38826 | h? | <i>vps15Δ::natMX atg6Δ::kanMX atg14Δ::hphMX ura4-D18 leu1-32::41nmt1p-GFP-atg38(leu1+) ars1::41nmt1p-pil1-mCherry-vps34(ura4+)</i>               | Fig. S6E,F        |
| DY38825 | h? | <i>vps15Δ::natMX atg6Δ::kanMX atg14Δ::hphMX ura4-D18 leu1-32::41nmt1p-GFP-vps34(leu1+) ars1::41nmt1p-pil1-mCherry-atg38(ura4+)</i>               | Fig. S6G,H        |
| DY38814 | h? | <i>vps15Δ::kanMX vps34Δ::natMX atg38Δ::hphMX ura4-D18 leu1-32::41nmt1p-GFP-atg14(leu1+) ars1::41nmt1p-pil1-mCherry-atg6(ura4+)</i>               | Fig. S6I,J        |
| DY38819 | h? | <i>vps15Δ::kanMX vps34Δ::natMX atg38Δ::hphMX ura4-D18 leu1-32::41nmt1p-GFP-atg6(leu1+) ars1::41nmt1p-pil1-mCherry-atg14(ura4+)</i>               | Fig. S6K,L        |

|         |    |                                                                                                                               |            |
|---------|----|-------------------------------------------------------------------------------------------------------------------------------|------------|
| DY37494 | h? | <i>vps15Δ::kanMX vps34Δ::natMX ura4-D18 leu1-32::41nmt1p-GFP-vps38(leu1+) ars1::41nmt1p-pil1-mCherry-atg6(ura4+)</i>          | Fig. S6M,N |
| DY37491 | h? | <i>vps15Δ::kanMX vps34Δ::natMX ura4-D18 leu1-32::41nmt1p-GFP-atg6(leu1+) ars1::41nmt1p-pil1-mCherry-vps38(ura4+)</i>          | Fig. S6O,P |
| DY39042 | h? | <i>ura4-D18 41nmt1p-CFP-vps34::hphMX leu1-32::41nmt1p-GFP-atg6(leu1+) ars1::41nmt1p-pil1-mCherry-vps15(ura4+)</i>             | Fig. S7A,B |
| DY39045 | h? | <i>ura4-D18 41nmt1p-CFP-vps34::hphMX leu1-32::41nmt1p-GFP-atg14(leu1+) ars1::41nmt1p-pil1-mCherry-vps15(ura4+)</i>            | Fig. S7C,D |
| DY39049 | h? | <i>ura4-D18 41nmt1p-CFP-vps34::hphMX leu1-32::41nmt1p-GFP-vps38(leu1+) ars1::41nmt1p-pil1-mCherry-vps15(ura4+)</i>            | Fig. S7E,F |
| DY36284 | h+ | <i>ura4-D18 leu1-32::41nmt1p-GFP-vps34(leu1+) ars1::41nmt1p-pil1-mCherry-atg14(ura4+)</i>                                     | Fig. S8A,B |
| DY36706 | h+ | <i>ura4-D18 his3::41nmt1p-CFP-atg6(his3- hphMX) leu1-32::41nmt1p-GFP-vps34(leu1+) ars1::41nmt1p-pil1-mCherry-atg14(ura4+)</i> | Fig. S8A,B |
| DY36709 | h+ | <i>ura4-D18 his3::41nmt1p-CFP-atg6(his3- hphMX) leu1-32::41nmt1p-GFP-vps34(leu1+) ars1::41nmt1p-pil1-mCherry-vps38(ura4+)</i> | Fig. S8C,D |
| DY39090 | h? | <i>ura4-D18 his3::41nmt1p-CFP-atg6(his3- hphMX) leu1-32::41nmt1p-GFP-atg38(leu1+) ars1::41nmt1p-pil1-mCherry-atg14(ura4+)</i> | Fig. S8E,F |

943

944

945

946

947

948

949

950

951

952

953

954

955

956

957

958

959 **Table S2.** Plasmids used in this study

| Name    | Descriptive name                                                          | Description                                                                                             |
|---------|---------------------------------------------------------------------------|---------------------------------------------------------------------------------------------------------|
| pDB4924 | pDUAL- <i>41nmt1p</i> -Pil1-mCherry                                       | pDUAL plasmid expressing Pil1-mCherry from <i>41nmt1</i> promoter                                       |
| pDB4925 | pDUAL- <i>41nmt1p</i> -Pil1-mCherry-Atg38(161-190)                        | pDUAL plasmid expressing Pil1-mCherry-Atg38(161-190) from <i>41nmt1</i> promoter                        |
| pDB4926 | pDUAL- <i>41nmt1p</i> -Pil1-mCherry-Atg38(161-190) <sup>F178A</sup>       | pDUAL plasmid expressing Pil1-mCherry-Atg38(161-190) <sup>F178A</sup> from <i>41nmt1</i> promoter       |
| pDB4927 | pDUAL- <i>41nmt1p</i> -Pil1-mCherry-Atg38(161-190) <sup>V181A</sup>       | pDUAL plasmid expressing Pil1-mCherry-Atg38(161-190) <sup>V181A</sup> from <i>41nmt1</i> promoter       |
| pDB4928 | pDUAL- <i>41nmt1p</i> -Pil1-mCherry-Atg38(161-190) <sup>F178A V181A</sup> | pDUAL plasmid expressing Pil1-mCherry-Atg38(161-190) <sup>F178A V181A</sup> from <i>41nmt1</i> promoter |
| pDB4658 | pDUAL- <i>41nmt1p</i> -GFP-Atg8                                           | pDUAL plasmid expressing GFP-Atg8 from <i>41nmt1</i> promoter                                           |
| pDB4659 | pDUAL- <i>41nmt1p</i> -GFP-Atg8 <sup>P52A R67A</sup>                      | pDUAL plasmid expressing GFP-Atg8 <sup>P52A R67A</sup> from <i>41nmt1</i> promoter                      |
| pDB4929 | pDUAL- <i>41nmt1p</i> -Pil1-mCherry-Atg8(1-115)                           | pDUAL plasmid expressing Pil1-mCherry-Atg8(1-115) from <i>41nmt1</i> promoter                           |
| pDB4923 | pDUAL- <i>41nmt1p</i> -Pil1-mCherry-Ctl1                                  | pDUAL plasmid expressing Pil1-mCherry-Ctl1 from <i>41nmt1</i> promoter                                  |
| pDB4922 | pDUAL- <i>nmt1p</i> -Atg9-YFH                                             | pDUAL plasmid expressing Atg9-YFH from <i>nmt1</i> promoter                                             |
| pDB4930 | pDUAL- <i>41nmt1p</i> -Pil1-mCherry-Xrc4                                  | pDUAL plasmid expressing Pil1-mCherry-Xrc4 from <i>41nmt1</i> promoter                                  |
| pDB4931 | pDUAL- <i>41nmt1p</i> -Lig4-GFP                                           | pDUAL plasmid expressing Lig4-GFP from <i>41nmt1</i> promoter                                           |
| pDB4932 | pDUAL- <i>41nmt1p</i> -Lig4(741-913)-GFP                                  | pDUAL plasmid expressing Lig4(741-913)-GFP from <i>41nmt1</i> promoter                                  |
| pDB4933 | pDUAL- <i>41nmt1p</i> -Pil1-mCherry-Atg1                                  | pDUAL plasmid expressing Pil1-mCherry-Atg1 from <i>41nmt1</i> promoter                                  |
| pDB4934 | pDUAL- <i>41nmt1p</i> -Pil1-mCherry-Atg11                                 | pDUAL plasmid expressing Pil1-mCherry-Atg11 from <i>41nmt1</i> promoter                                 |
| pDB4935 | pDUAL- <i>41nmt1p</i> -Pil1-mCherry-Atg13                                 | pDUAL plasmid expressing Pil1-mCherry-Atg13 from <i>41nmt1</i> promoter                                 |
| pDB4936 | pDUAL- <i>41nmt1p</i> -Pil1-mCherry-Atg17                                 | pDUAL plasmid expressing Pil1-mCherry-Atg17 from <i>41nmt1</i> promoter                                 |
| pDB4937 | pDUAL- <i>41nmt1p</i> -Pil1-mCherry-Atg101                                | pDUAL plasmid expressing Pil1-mCherry-Atg101 from <i>41nmt1</i> promoter                                |
| pDB4938 | pDUAL- <i>41nmt1p</i> -Atg1-GFP                                           | pDUAL plasmid expressing Atg1-GFP from <i>41nmt1</i> promoter                                           |

|         |                                                    |                                                                                  |
|---------|----------------------------------------------------|----------------------------------------------------------------------------------|
| pDB4939 | pDUAL- <i>41nmt1p</i> -Atg11-GFP                   | pDUAL plasmid expressing Atg11-GFP from <i>41nmt1</i> promoter                   |
| pDB4940 | pDUAL- <i>41nmt1p</i> -Atg13-GFP                   | pDUAL plasmid expressing Atg13-GFP from <i>41nmt1</i> promoter                   |
| pDB4941 | pDUAL- <i>41nmt1p</i> -Atg17-GFP                   | pDUAL plasmid expressing Atg17-GFP from <i>41nmt1</i> promoter                   |
| pDB4942 | pDUAL- <i>41nmt1p</i> -Atg101-GFP                  | pDUAL plasmid expressing Atg101-GFP from <i>41nmt1</i> promoter                  |
| pDB4943 | pDUAL- <i>41nmt1p</i> -Pil1-mCherry-Vps15          | pDUAL plasmid expressing Pil1-mCherry-Vps15 from <i>41nmt1</i> promoter          |
| pDB4944 | pDUAL- <i>41nmt1p</i> -Pil1-mCherry-Vps34          | pDUAL plasmid expressing Pil1-mCherry-Vps34 from <i>41nmt1</i> promoter          |
| pDB4945 | pDUAL- <i>41nmt1p</i> -Pil1-mCherry-Atg6           | pDUAL plasmid expressing Pil1-mCherry-Atg6 from <i>41nmt1</i> promoter           |
| pDB4946 | pDUAL- <i>41nmt1p</i> -Pil1-mCherry-Atg14          | pDUAL plasmid expressing Pil1-mCherry-Atg14 from <i>41nmt1</i> promoter          |
| pDB4947 | pDUAL- <i>41nmt1p</i> -Pil1-mCherry-Atg38          | pDUAL plasmid expressing Pil1-mCherry-Atg38 from <i>41nmt1</i> promoter          |
| pDB4948 | pDUAL- <i>41nmt1p</i> -Pil1-mCherry-Vps38          | pDUAL plasmid expressing Pil1-mCherry-Vps38 from <i>41nmt1</i> promoter          |
| pDB4949 | pDUAL- <i>41nmt1p</i> -Pil1-mCherry-Vps34(1-250)   | pDUAL plasmid expressing Pil1-mCherry-Vps34(1-250) from <i>41nmt1</i> promoter   |
| pDB4950 | pDUAL- <i>41nmt1p</i> -Pil1-mCherry-Vps34(251-801) | pDUAL plasmid expressing Pil1-mCherry-Vps34(251-801) from <i>41nmt1</i> promoter |
| pDB4951 | pDUAL- <i>41nmt1p</i> -GFP-Vps15                   | pDUAL plasmid expressing GFP-Vps15 from <i>41nmt1</i> promoter                   |
| pDB4952 | pDUAL- <i>41nmt1p</i> -GFP-Vps34                   | pDUAL plasmid expressing GFP-Vps34 from <i>41nmt1</i> promoter                   |
| pDB4953 | pDUAL- <i>41nmt1p</i> -GFP-Atg6                    | pDUAL plasmid expressing GFP-Atg6 from <i>41nmt1</i> promoter                    |
| pDB4954 | pDUAL- <i>41nmt1p</i> -GFP-Atg14                   | pDUAL plasmid expressing GFP-Atg14 from <i>41nmt1</i> promoter                   |
| pDB4955 | pDUAL- <i>41nmt1p</i> -GFP-Atg38                   | pDUAL plasmid expressing GFP-Atg38 from <i>41nmt1</i> promoter                   |
| pDB4956 | pDUAL- <i>41nmt1p</i> -GFP-Vps38                   | pDUAL plasmid expressing GFP-Vps38 from <i>41nmt1</i> promoter                   |
| pDB4957 | pHIS3H- <i>41nmt1p</i> -CFP-Vps34                  | pHIS3H plasmid expressing CFP-Vps34 from <i>41nmt1</i> promoter                  |
| pDB4958 | pHIS3H- <i>41nmt1p</i> -CFP-Atg6                   | pHIS3H plasmid expressing CFP-Atg6 from <i>41nmt1</i> promoter                   |
| pDB4959 | pHIS3H- <i>41nmt1p</i> -CFP-Atg14                  | pHIS3H plasmid expressing CFP-Atg14 from <i>41nmt1</i> promoter                  |

|         |                                                            |                                                                                          |
|---------|------------------------------------------------------------|------------------------------------------------------------------------------------------|
| pDB4960 | pHIS3H- <i>4lnmt1p</i> -CFP-Vps38                          | pHIS3H plasmid expressing CFP-Vps38 from <i>4lnmt1</i> promoter                          |
| pDB4961 | pHIS3H- <i>4lnmt1p</i> -13Myc-Vps15                        | pHIS3H plasmid expressing 13Myc-Vps15 from <i>4lnmt1</i> promoter                        |
| pDB4972 | pDUAL- <i>nmt1p</i> -Atg38-mCherry                         | pDUAL plasmid expressing Atg38-mCherry from <i>nmt1</i> promoter                         |
| pDB4973 | pDUAL- <i>nmt1p</i> -Atg38 <sup>F157A</sup> -mCherry       | pDUAL plasmid expressing Atg38 <sup>F157A</sup> -mCherry from <i>nmt1</i> promoter       |
| pDB4974 | pDUAL- <i>nmt1p</i> -Atg38-mCherry-Vps34                   | pDUAL plasmid expressing Atg38-mCherry-Vps34 from <i>nmt1</i> promoter                   |
| pDB4975 | pDUAL- <i>nmt1p</i> -Atg38 <sup>F157A</sup> -mcherry-vps34 | pDUAL plasmid expressing Atg38 <sup>F157A</sup> -mCherry-Vps34 from <i>nmt1</i> promoter |

960
